# Supplementary material for: The Brain Games study: protocol for a randomised controlled trial of computerised cognitive training for preventing mental illness in adolescents with high-risk personality styles
Source: PubMed Central journal article supplement — BMJ Open. 2017 Sep 25;7(9):e017721. doi: 10.1136/bmjopen-2017-017721 (PMC5623502; doi:10.1136/bmjopen-2017-017721), 2017-09-25
Supplement: bmjopen-2017-017721.draft_revisions.pdf [file bmjopen-2017-017721.draft_revisions.pdf]

# BMJ Open

BMJ Open is committed to open peer review. As part of this commitment we make the peer review history of every article we publish publicly available.

When an article is published we post the peer reviewers' comments and the authors' responses online. We also post the versions of the paper that were used during peer review. These are the versions that the peer review comments apply to.

The versions of the paper that follow are the versions that were submitted during the peer review process. They are not the versions of record or the final published versions. They should not be cited or distributed as the published version of this manuscript.

BMJ Open is an open access journal and the full, final, typeset and author-corrected version of record of the manuscript is available on our site with no access controls, subscription charges or pay-per-view fees (<http://bmjopen.bmj.com>).

If you have any questions on BMJ Open's open peer review process please email [info.bmjopen@bmj.com](mailto:info.bmjopen@bmj.com)

# BMJ Open

## The Brain Games study: A randomised controlled trial of computerised cognitive training for preventing mental illness in adolescents with high-risk personality styles

|                                 |                                                                                                                                                                                                                                                                                                                                                                                                                                                                                                                                                 |
|---------------------------------|-------------------------------------------------------------------------------------------------------------------------------------------------------------------------------------------------------------------------------------------------------------------------------------------------------------------------------------------------------------------------------------------------------------------------------------------------------------------------------------------------------------------------------------------------|
| Journal:                        | <i>BMJ Open</i>                                                                                                                                                                                                                                                                                                                                                                                                                                                                                                                                 |
| Manuscript ID                   | bmjopen-2017-017721                                                                                                                                                                                                                                                                                                                                                                                                                                                                                                                             |
| Article Type:                   | Protocol                                                                                                                                                                                                                                                                                                                                                                                                                                                                                                                                        |
| Date Submitted by the Author:   | 15-May-2017                                                                                                                                                                                                                                                                                                                                                                                                                                                                                                                                     |
| Complete List of Authors:       | Mewton, Louise; University of New South Wales, National Drug and Alcohol Research Centre<br>Hodge, Antoinette; Child Development Unit, The Children's Hospital at Westmead<br>Gates, Nicola; University of New South Wales, Centre for Healthy Brain Aging<br>Visontay, Rachel; University of New South Wales - Randwick Campus, National Drug and Alcohol Research Centre<br>Teesson, Maree; University of New South Wales, NHMRC Centre for Research Excellence in Mental Health and Substance Use, National Drug and Alcohol Research Centre |
| <b>Primary Subject Heading</b>: | Mental health                                                                                                                                                                                                                                                                                                                                                                                                                                                                                                                                   |
| Secondary Subject Heading:      | Public health                                                                                                                                                                                                                                                                                                                                                                                                                                                                                                                                   |
| Keywords:                       | cognitive training, mental illness, adolescence, prevention, internet-delivered                                                                                                                                                                                                                                                                                                                                                                                                                                                                 |
|                                 |                                                                                                                                                                                                                                                                                                                                                                                                                                                                                                                                                 |

SCHOLARONE™  
Manuscripts

1  
2  
3 **The *Brain Games* study: A randomised controlled trial of computerised**  
4  
5 **cognitive training for preventing mental illness in adolescents with high-risk**  
6  
7  
8 **personality styles**  
9

10 Mewton, L<sup>1</sup>., Hodge, A<sup>2</sup>., Gates, N<sup>3</sup>., Visontay, R<sup>4</sup>. & Teesson, M<sup>5</sup>.

11  
12  
13 <sup>1</sup> Centre of Research Excellence in Mental Health and Substance Use, National Drug and Alcohol  
14 Research Centre, University of New South Wales, NSW, Randwick 2031. Email:

15  
16  
17  
18  
19  
20  
21  
22  
23  
24  
25  
26  
27  
28  
29  
30  
31  
32  
33  
34  
35  
36  
37  
38  
39  
40  
41  
42  
43  
44  
45  
46  
47  
48  
49  
50  
51  
52  
53  
54  
55  
56  
57  
58  
59  
60

louisem@unsw.edu.au

<sup>2</sup> Child Development Unit, The Children's Hospital at Westmead, Westmead, NSW, 2145. Email:  
antoINETte.hodge@health.nsw.gov.au

<sup>3</sup> Centre for Healthy Brain Aging (CHeBA), Medicine, University of New South Wales, NSW  
Randwick, 2031. Email: [nicolagates@bigpond.com](mailto:nicolagates@bigpond.com)

<sup>4</sup> Centre of Research Excellence in Mental Health and Substance Use, National Drug and Alcohol  
Research Centre, University of New South Wales, NSW, Randwick 2031. Email:  
r.visontay@unsw.edu.au

<sup>5</sup> Centre of Research Excellence in Mental Health and Substance Use, National Drug and Alcohol  
Research Centre, University of New South Wales, NSW, Randwick 2031. Email:  
m.teesson@unsw.edu.au

Correspondence concerning this article should be addressed to Dr Louise Mewton, Centre of  
Research Excellence in Mental Health and Substance Use, National Drug and Alcohol Research  
Centre, University of New South Wales, NSW, Randwick 2031. E-mail: [louisem@unsw.edu.au](mailto:louisem@unsw.edu.au)

## Abstract

*Introduction:* A broad range of mental disorders are now understood as aberrations of normal adolescent brain development. In both adolescents and adults, executive dysfunction has been implicated across a range of mental illnesses and enhancing executive functioning may prove to be a useful prevention strategy for adolescents at risk for a range of psychopathology. *Methods and analysis:* This study will consist of a double-blind, randomised controlled trial with a 12-month follow-up period. Participants will consist of 200 16-24 year olds who are at risk for a range of mental disorders based on personality risk factors, but have not experienced a lifetime mental illness as determined by a structured diagnostic interview. Participants will be randomly allocated to either an intervention group who complete an online cognitive training program specifically targeting executive functioning ability, or a control group who complete an online cognitive training program that has limited executive functioning training potential. Superiority of the executive functioning training program compared with the control training program will be assessed at baseline, post-training, and at 3-, 6- and 12-months follow-up. All assessments will be conducted online. The primary outcome of the study will be general psychopathology as measured by the Strengths and Difficulties Questionnaire (SDQ). Secondary outcomes will include executive functioning ability, day-to-day functioning and alcohol consumption. All analyses will be undertaken using mixed-model repeated measures ANOVA with planned contrasts. *Ethics and dissemination:* Ethics approval has been obtained from the University of New South Wales Human Research Ethics Committee (HC15094). Results of the trial immediately post-treatment and at 12-months follow-up will be submitted for publication in peer-reviewed journals. *Trial registration:* This trial is registered with the Australian and New Zealand Clinical Trials registry, ACTRN12616000127404. Registered 4 February 2016. Data collection ongoing 10 May 2017.

**Key words:** cognitive training, mental illness, adolescence, prevention, internet-delivered

**Strengths and limitations of the study:**

- This study has been designed to demonstrate genuine transfer of skills beyond task-specific learning, a limitation often identified within the cognitive training literature
- This study includes a rigorous active control condition meaning any differences between conditions can be confidently ascribed to improvements in executive functioning rather than other confounding factors
- This study will assess whether any effects are maintained over an extended 12-month follow-up period
- Participant contact will be limited and many processes will be automated, meaning that significant attrition is expected and has been accounted for in sample size calculations
- It may also be that the executive functioning intervention tasks are more engaging than the control tasks by virtue of their complexity and the mental process required for their completion, with subsequent differential attrition rates across the conditions

## Introduction

Anxiety, depressive and substance use disorders frequently have the same risk factors, co-occur and interact in adolescence and young adulthood. Amongst young people (aged 15-24), the top ten causes of burden of disease are dominated by mental illness and substance use [1]. The US National Comorbidity Survey Adolescent Supplement (NCS-A) indicated that approximately 1 in 4 adolescents in the general population met criteria for an anxiety or affective disorder and 1 in 10 adolescents in the general population met criteria for a substance use disorder [2]. The same data indicated that almost a third (29%) of adolescents with one disorder in the general population also met criteria for another disorder, with a mean of 3 psychiatric disorders amongst those with comorbidity [3]. Mental illness is highly prevalent and comorbid in young people, and prevention programs need to be initiated early to reduce the occurrence, cost and significant functional impairment associated with these problems.

Given their typical age of onset, a broad range of mental disorders are increasingly being understood as the result of aberrations of developmental processes that normally occur in the adolescent brain [4-6]. Executive functioning, and its neurobiological substrate, the prefrontal cortex, matures during adolescence [5]. The relatively late maturation of executive functioning is adaptive in most cases, underpinning characteristic adolescent behaviours such as social interaction, risk-taking and sensation seeking which promote successful adult development and independence [6]. However, in some cases it appears that the delayed maturation of prefrontal regulatory regions leads to the development of mental illness, with neurobiological studies indicating a broad deficit in executive functioning which precedes and underpins a range of psychopathology [7]. A recent meta-analysis of neuroimaging studies focusing on a range of psychotic and nonpsychotic mental illnesses, found grey matter loss in the dorsal anterior cingulate, and left and right insula, was common across diagnoses [8]. In a healthy sample, this study also

1  
2  
3 demonstrated that lower grey matter in these regions was found to be associated with deficits in  
4  
5 executive functioning performance. Similarly, another recent functional imaging study focused on  
6  
7 1,129 community youths (mean age 15.5 years) and investigated the relationship between  
8  
9 psychopathology and activation of the executive system during a working memory task [9]. Overall  
10  
11 psychopathology was associated with hypoactivation in the frontal pole, anterior cingulate, anterior  
12  
13 insula and precuneas, implicating a network of executive regions across a range of psychiatric  
14  
15 diagnoses. In both adolescents and adults, executive dysfunction has therefore been implicated  
16  
17 across a range of mental illnesses.  
18  
19

20  
21  
22  
23 Whilst the functional and structural organisation of the human brain was once considered static  
24  
25 after critical developmental periods, it is now evident that neural changes are possible throughout  
26  
27 the lifespan [10]. Experience-dependent neural reorganisation, or neuroplasticity, is apparent in  
28  
29 response to repetitive and adaptive task engagement, disease, neglect and injury [11]. Cognitive  
30  
31 training is one of many interventions (including brain stimulation, neuropharmacology, physical  
32  
33 exercise and neurofeedback) that harnesses experience-dependent neuroplasticity with the aim of  
34  
35 achieving durable behavioural and functional change [11]. Cognitive training generally consists of  
36  
37 a program of exercises targeting specific cognitive skills, such as executive functioning, with the  
38  
39 aim of achieving adaptive neural changes which underpin improvements in cognition and/or  
40  
41 behaviour [12]. Cognitive training therapies, targeting a variety of cognitive processes, have  
42  
43 demonstrated success in a range of clinical populations, including preliminary evidence of  
44  
45 improvement in symptoms and cognition in those with affective, anxiety and substance use  
46  
47 disorders [12]. The usefulness of cognitive training for schizophrenia has been studied extensively,  
48  
49 with the research suggesting that such interventions can lead to enduring benefits for cognition and  
50  
51 contribute to gains in overall functioning in individuals with both early [13, 14] and established  
52  
53 [15, 16] symptoms.  
54  
55  
56  
57  
58  
59  
60

1  
2  
3  
4  
5 Evidence therefore suggests that cognitive training may be a useful intervention strategy for those  
6  
7 already showing symptoms of psychopathology, whether delivered during the early stages of  
8  
9 mental illness or later in the course of disease progression. However, the effectiveness of cognitive  
10  
11 training as a preventative strategy has not been thoroughly investigated. This is despite the  
12  
13 evidence suggesting that cognitive impairments [4], and associated loss of day-to-day functioning  
14  
15 [17, 18], frequently precede the onset of mental illness and may represent a non-specific prodromal  
16  
17 phase for a broad range of mental illnesses. As such, for individuals identified as at high risk for  
18  
19 developing a mental illness, cognitive training may therefore delay and, in some cases, prevent the  
20  
21 onset of a clinical disorder. Given the evidence to suggest that deficits in executive functioning are  
22  
23 associated with psychopathology across a range of mental illnesses [8, 9], this may be particularly  
24  
25 the case for cognitive training using exercises focusing on this domain.  
26  
27  
28  
29  
30  
31

32 A small pilot study has demonstrated the feasibility of using cognitive training as a targeted  
33  
34 prevention strategy during the critical adolescent period [19]. In this study, 15 adolescents (mean  
35  
36 age ~13 years) experiencing social, emotional and behavioural difficulties, but without a clinical  
37  
38 diagnosis, were randomised to a cognitive training intervention group (n=7) or a passive control  
39  
40 group (n=8). The training group completed a 30-40 minute battery of visuospatial and verbal  
41  
42 working memory tasks, five days a week, for five weeks. Compared with the passive control group,  
43  
44 those in the intervention group showed significantly better post-training scores on measures of IQ,  
45  
46 inhibition, test anxiety, and teacher-reported behaviour, attention and emotional symptoms. These  
47  
48 findings provide encouraging support for the notion that cognitive training delivered to at risk  
49  
50 adolescents may potentially prevent the onset of more serious social, emotional and behavioural  
51  
52 problems.  
53  
54  
55  
56  
57  
58  
59  
60



1  
2  
3 Another study piloted a preventative cognitive training program; this time for those at clinical high  
4 risk for psychosis [20]. While there were encouraging results, particularly in respect to  
5  
6 improvements in processing speed and prodromal symptoms, there was no comparison group used.  
7  
8 However, the findings provide further evidence of the feasibility of an intensive cognitive training  
9  
10 program for adolescents at risk for the development of mental illness. On the other hand, in another  
11  
12 pilot study targeting individuals at clinical high risk for psychosis, there were no significant  
13  
14 differences in cognition between the intervention and control groups immediately post-training  
15  
16 [21]. Furthermore, high attrition rates led the authors to suggest that more engaging interventions  
17  
18 should be trialled, especially for younger age groups.  
19  
20  
21  
22  
23

24  
25 Despite these promising findings in terms of both the treatment and prevention of mental illness,  
26  
27 several limitations of the cognitive training literature have been noted [22]. The ultimate goal of  
28  
29 cognitive training is to demonstrate that improvements in performing a particular task transfer to  
30  
31 improvements in an underlying cognitive ability more generally (near transfer; i.e., training on a  
32  
33 specific executive functioning task leads to improvements in overall executive functioning ability).  
34  
35 This improvement in cognition generally would then be the basis for any improvements in  
36  
37 behaviour (far transfer; i.e., improvements in overall executive functioning ability lead to decreases  
38  
39 in psychopathology). However, the ways in which near transfer have been investigated in many  
40  
41 previous studies has been flawed. Often only a single untrained task is used to measure near  
42  
43 transfer to the underlying cognitive ability [22]. The capacity for a single task to accurately reflect  
44  
45 multifaceted and complex cognitive abilities is questionable. Multiple tasks which measure  
46  
47 different dimensions of the underlying cognitive ability are therefore required. Many previous  
48  
49 studies have also used no control group or a “no contact” control group, which means that it is  
50  
51 often not possible to rule out placebo effects [22]. Finally, the assessment of training effects rarely  
52  
53  
54  
55  
56  
57  
58  
59  
60

1  
2  
3 extends beyond immediately post-training [22], meaning that the durability of any training effects  
4  
5 has not been established.  
6  
7

8  
9  
10 The primary objective of the *Brain Games* study is to therefore investigate whether cognitive  
11  
12 training delivered online within a “smart gaming” platform is a viable targeted prevention strategy  
13  
14 by examining its ability to reduce psychopathology in young people at high risk for developing a  
15  
16 mental illness. In order to identify those at risk for developing a mental illness, this study will target  
17  
18 personality risk factors, including hopelessness, anxiety sensitivity, impulsivity, and sensation  
19  
20 seeking, which have been shown to reliably predict substance misuse, anxiety, emotional and  
21  
22 behavioural disorders in young people [23, 24]. It is hypothesised that the intervention cognitive  
23  
24 training program (focusing on executive functioning) will be more effective than the active control  
25  
26 cognitive training program (focusing on cognitive abilities other than executive functioning) in  
27  
28 reducing psychopathology. Secondary aims include assessing the comparative effects of the  
29  
30 intervention and control training programs on executive functioning ability, day-to-day functioning  
31  
32 and alcohol consumption.  
33  
34  
35  
36  
37

## 38 **Methods and analysis**

### 39 **Study design**

40  
41 This study will consist of a parallel group randomised controlled trial with a 12-month follow-up  
42  
43 period. The conduct and reporting of the trial will be in accordance with the CONSORT statement  
44  
45 for non-pharmacological interventions. Participants will be randomly allocated to one of two  
46  
47 cognitive training conditions: (1) the intervention group (cognitive training specifically focused on  
48  
49 executive functioning), or (2) the control group (cognitive training focusing on other cognitive  
50  
51 abilities). The allocation ratio will be 1:1. Superiority of the executive functioning training program  
52  
53 compared with the control training program will be assessed at baseline, post-training, and at 3-, 6-  
54  
55  
56  
57  
58  
59  
60

1  
2  
3 and 12-months follow-up. All assessments will be conducted online. The primary outcome of the  
4  
5 study will be general psychopathology as measured by the Strengths and Difficulties Questionnaire  
6  
7 (SDQ). Secondary outcomes will include executive functioning ability, day-to-day functioning and  
8  
9 alcohol consumption.  
10

### 11 12 13 *Sample size calculations*

14  
15 The primary outcome measure will be scores on the self-report version of the Strengths and  
16  
17 Difficulties Questionnaire (SDQ), a measure of psychopathology in young people with excellent  
18  
19 psychometric properties [25] and test-retest reliability [26]. One previous pilot study has  
20  
21 investigated the effect of cognitive training on psychopathology in at-risk young people using the  
22  
23 SDQ [19]. According to this study, there was a between-group effect size of .36 for the SDQ. A  
24  
25 similar effect size difference on the SDQ would therefore be expected in the current study. A total  
26  
27 sample size of  $n = 140$  ( $n=70$  per group) is powered to have an 80% chance of detecting .36 effect  
28  
29 size differences at  $p < 0.5$ . We will therefore aim to recruit  $n=200$  ( $n=100$  per group) in order to  
30  
31 account for potential attrition.  
32  
33  
34  
35  
36  
37

### 38 **Procedure**

#### 39 *Participants and recruitment*

40  
41 Participants will be aged 16-24 years and at risk for a range of mental disorders. Participants will  
42  
43 be included if they meet the following criteria: 1) at high risk for development of a mental illness  
44  
45 based on elevated levels of personality risk factors, including hopelessness, anxiety  
46  
47 sensitivity, impulsivity, and sensation seeking; 2) ability to access the internet via a computer; 4)  
48  
49 residing within Australia; and 3) willingness to provide contact details. Exclusion criteria will be:  
50  
51 1) insufficient English comprehension; 2) a lifetime mental illness diagnosis; 3) current  
52  
53 involvement in psychotherapy or taking medication for mental illness, pain, thyroid problems  
54  
55  
56  
57  
58  
59  
60

1  
2  
3 and/or epilepsy; 4) intellectual disability; 5) a history of neurological or cardiovascular disorders,  
4  
5 brain surgery, electroconvulsive or radiation treatment, thyroid disorders, brain haemorrhage or  
6  
7 tumour, stroke, diabetes, seizures or epilepsy; and 6) significant previous experience with online  
8  
9 cognitive training programs.  
10

11  
12  
13  
14 Community participants will be recruited through advertisements on social media platforms, and  
15  
16 will indicate their interest by clicking on the advertisement, after which they will be taken to the  
17  
18 study website ([www.braingames.org](http://www.braingames.org)) that provides more detailed information about the study.  
19

20  
21 Online informed consent will be sought to complete online eligibility screening which will be  
22  
23 conducted through the study website and assess for all exclusion and inclusion criteria, except for a  
24  
25 prior diagnosis of a mental illness. If eligible, participants will be asked to provide written informed  
26  
27 consent for a telephone-administered diagnostic interview conducted by a trained researcher from  
28  
29 the University of New South Wales, Australia, as well as for participation in the study itself. Upon  
30  
31 receipt of the signed informed consent, participants will be contacted by a member of the research  
32  
33 team who will administer a diagnostic interview assessing for lifetime diagnoses of major  
34  
35 depressive disorder, panic disorder, social anxiety disorder, generalised anxiety disorder, obsessive-  
36  
37 compulsive disorder, posttraumatic stress disorder, alcohol dependence, other substance  
38  
39 dependence, attention deficit hyperactivity disorder, conduct disorder and oppositional defiant  
40  
41 disorder. Those who do not meet eligibility criteria after completion of the online or telephone-  
42  
43 administered interviews will be informed of their ineligibility, and given referrals and/or  
44  
45 information for crisis care where necessary. After telephone screening, eligible participants will be  
46  
47 sent a link to complete the baseline assessment through the study website. Following baseline  
48  
49 assessment, participants will be given a unique code which will be randomly associated with one of  
50  
51 the two cognitive training conditions. Randomisation of these codes to the intervention and control  
52  
53 conditions will be conducted by an offsite technician who will allocate all unique codes to one of  
54  
55  
56  
57  
58  
59  
60

1  
2  
3 the two conditions through the website random.org. Both the research team and participant will be  
4  
5 blind to this allocation. Participants will be free to withdraw from the study at any time, and will  
6  
7 not be prohibited from seeking concomitant care. Those participants who do withdraw will not  
8  
9 complete any further assessments. Enrolment into the study will be rolling, with each participant  
10  
11 starting their training the day after they have completed their baseline tasks.  
12  
13

### 14 15 16 *Intervention and control conditions*

17  
18 Both the intervention and control conditions will complete cognitive training consisting of  
19  
20 computerised tasks provided by *Lumosity* (<http://www.lumosity.com/>), and administered on a  
21  
22 remote internet-connected computer owned by the participant. All tasks within the commercially  
23  
24 available *Lumosity* package have “game-like” features making them visually engaging and  
25  
26 motivating. The tasks are designed to be dynamic and adaptive, such that the difficulty increases as  
27  
28 the participants’ performance improves. Training for both conditions will consist of an intensive  
29  
30 program of one hour per day, five days per week, over five weeks. Training compliance will be  
31  
32 assessed during the active training phase, with reminder emails and text messages sent after one  
33  
34 missed session, and telephone contact initiated after two missed sessions. Given the non-invasive  
35  
36 nature of the intervention, adverse events are not anticipated. Spontaneous reporting of adverse  
37  
38 events will be discussed with the study clinicians and responded to according to their  
39  
40 recommendations. Training games for the intervention group will specifically focus on executive  
41  
42 functioning, and will be based on classic paradigms used in cognitive neuroscience and executive  
43  
44 functioning batteries. The control group will be administered cognitive training games that do not  
45  
46 target executive functioning, and instead focus on field of view, verbal fluency and quantitative  
47  
48 reasoning. The features of the control tasks will be matched to those of the intervention tasks in all  
49  
50 other respects. Tasks included in both the intervention and control training programs were selected  
51  
52 on the basis of consensus ratings with experienced clinicians.  
53  
54  
55  
56  
57  
58  
59  
60

### *Assessment Occasions*

Both those assigned to the intervention and to the control group will be assessed at baseline, post-trial, and at 3-, 6- and 12- month follow-up intervals. All assessments at each occasion will be fully automated and conducted online using the participants' own computer.

## **Measures**

### *Eligibility screening*

Demographic data on gender, age, country of birth and rurality will be collected online before eligibility is assessed. Eligibility screening will consist of a 23-item self-report online questionnaire assessing personality risk factors [the Substance Use Risk Profile Scale (SURPS)] [27], with four subscales representing hopelessness, anxiety sensitivity, impulsivity, and sensation seeking.

Participants scoring one or more standard deviations above the mean on any of the four SURPS subscales will be deemed eligible for the current study. Threshold means and standard deviations will be based on a previous validity study of the SURPS in Australian adolescents [23]. Scores on these subscales have been shown to reliably predict future substance use, as well as anxiety, emotional and behavioural disorders. The SURPS has been shown to have good concurrent and predictive validity, and the separate subscales display good specificity [28].

For those aged less than 18 years, the telephone-administered diagnostic interview for lifetime mental illnesses will be conducted using a lifetime version of the Mini International Neuropsychiatric Interview for Children and Adolescents (MINI-KID). The MINI-KID is a structured, lay-administered self-report diagnostic interview for children of ages 6 to 17 years old which is designed to assess DSM-IV psychiatric disorders. The MINI-KID has been shown to have excellent reliability and excellent concordance with clinician diagnoses [29]. For those aged 18

1  
2  
3 years and older, a lifetime version of the Mini International Neuropsychiatric Interview (MINI) will  
4  
5 be administered. The MINI is also a structured, lay-administered self-report diagnostic interview  
6  
7 designed to assess DSM-IV psychiatric disorders with excellent reliability and good concordance  
8  
9 with a clinician-administered diagnostic interview [30, 31].  
10

#### 11 12 13 *Baseline assessment*

14  
15 Psychopathology will be assessed using the SDQ, a 25-item self-report behavioural screening  
16  
17 inventory for children and adolescents which measures positive and negative attributes of  
18  
19 participants [32]. The SDQ has been used extensively and has strong psychometric properties [25].  
20  
21 An online version of this questionnaire will be developed for the current study in consultation with  
22  
23 the original SDQ developers.  
24  
25  
26  
27

28  
29 An online version of the WHODAS 2.0 12-item version (World Health Organisation, 2010) will be  
30  
31 used to assess overall functioning and disability experienced as a result of health conditions  
32  
33 (including mental illness or substance use) over the past 30 days. The WHODAS has been used  
34  
35 extensively as a measure of functioning and disability and has been validated for use in youth  
36  
37 populations [33].  
38  
39  
40

41  
42 Participants' recent and historical alcohol consumption will be assessed online by 14 questions  
43  
44 adapted from the School Health and Alcohol Harm Reduction Project (SHAHRP) 'Patterns of  
45  
46 Alcohol' index [34]. These questions ask responders about the frequency and quantity of different  
47  
48 drinking behaviours, and age of first participation in these behaviours.  
49  
50

51  
52 Online executive functioning assessment will be included as a measure of executive functioning  
53  
54 improvement on untrained tasks. This assessment will consist of the N-Back Task [35] to evaluate  
55  
56  
57  
58  
59  
60

1  
2  
3 working memory, the Trail Making Test [36] to assess task shifting, and the Stroop Task [37] to  
4  
5 evaluate inhibitory control. These tasks will be administered using Inquisit software  
6  
7 (<http://www.millisecond.com/download/library/>).  
8  
9

10  
11 Participants will also be asked to answer an online questionnaire about their satisfaction with the  
12  
13 training program.  
14

### 15 16 17 18 *Follow-up assessments* 19

20 Each of the assessments at post-training, 3-, 6- and 12-months follow-up will consist of the online  
21  
22 versions of the SDQ, SURPS, WHODAS and alcohol consumption questionnaires, as well as the  
23  
24 online executive functioning assessment. At the 12-month assessment, data will also be collected  
25  
26 on service use and any use of the *Lumosity* program over the follow-up period.  
27  
28

29  
30 All data collected in computerised format will be stored on password protected computers in  
31  
32 databases using pre-defined codes. Rigorous data encryption will restrict external access to  
33  
34 participant online content. The website uses industry leading encryption for all transmissions. The  
35  
36 SSL certificate includes domain authentication and 256-bit SSL encryption. HTTPS (SSL) will be  
37  
38 used for complete website including all sub domains. A data access layer (DAL) is used for all  
39  
40 database functionality requirements within the site with the majority of database connections set up  
41  
42 with stored procedures.  
43  
44  
45  
46  
47  
48

### 49 **Statistical Analysis**

50  
51 Data will be analysed on an intention-to-treat basis. All analyses will be undertaken using mixed-  
52  
53 model repeated measures (MMRM) ANOVA, with measurement occasion as a within-groups  
54  
55 factor, and experimental group as a between-groups factor. These models are robust to missing data  
56  
57  
58  
59  
60



1  
2  
3 under missing-at-random assumptions. Relationships between observations at different occasions  
4  
5 will be modelled with an unstructured covariance matrix. For each experimental group, planned  
6  
7 contrasts will be used to compare changes from baseline to post-test, 3-, 6- and 12- month follow-  
8  
9 up intervals.  
10

## 11 12 13 14 **Ethics and dissemination**

15  
16 Ethical approval for the *Brain Games* study has been granted from the UNSW Human Research  
17  
18 Ethics Committee (HC15094). Any protocol amendments will first be discussed by the team of  
19  
20 investigators after which an ethics modification will be submitted.  
21  
22

23  
24  
25 Results of the trial immediately post-treatment and at 12-months follow-up will be submitted for  
26  
27 publication in peer-reviewed journals. After all study data has been collected, all participants will  
28  
29 receive a document outlining the main results of the study. All lead investigators will be listed as  
30  
31 authors on all publications unless they opt out of authorship.  
32  
33

34  
35  
36 The de-identified dataset generated and analysed during the current study are available from the  
37  
38 corresponding author on reasonable request.  
39  
40

## 41 42 43 **Discussion**

44  
45 The present study protocol presents the design of a randomised controlled trial that assesses  
46  
47 whether online executive functioning training is a viable strategy for the targeted prevention of  
48  
49 mental illness and substance use in high-risk youth. The primary aim of the *Brain Games* trial is to  
50  
51 investigate whether an executive functioning training program is more effective at preventing  
52  
53 symptoms of psychopathology than cognitive training that has limited executive functioning  
54  
55 training potential. By investigating a novel prevention strategy targeting executive functioning, the  
56  
57  
58  
59  
60

1  
2  
3 *Brain Games* study will be the first full-scale trial conducted internationally that investigates the  
4  
5 utility of cognitive training in the prevention of mental illness in high-risk adolescents. This study  
6  
7 targets underlying executive functioning deficits that have been identified across the boundaries of  
8  
9 traditional categorical psychiatric diagnoses. Novel universal prevention programs that cross  
10  
11 diagnostic boundaries are currently being trialled in Australian schools [38]. For high-risk  
12  
13 adolescents, however, universal prevention programs have been shown to have limited benefits  
14  
15 [39]. It is envisaged that transdiagnostic prevention strategies that target high-risk adolescents, such  
16  
17 as the present one, would eventually complement and augment a transdiagnostic approach to  
18  
19 universal prevention. This stepped-care sequential prevention model has the potential to maximize  
20  
21 outcomes for both high- and low-risk youth across a range of mental illnesses and reduce the  
22  
23 considerable burden of disease associated with these illnesses in adolescence.  
24  
25  
26  
27  
28

## 29 **Declarations**

### 30 *Authors' contributions*

31  
32 LM is the Chief Investigator of the *Brain Games* study. AH and NG provide clinical and  
33  
34 neuropsychological expertise and MT provides expertise in prevention research. LM, AH, NG and  
35  
36 MT were all involved in the study design. LM and RV are involved in data collection. All authors  
37  
38 will be involved in the reporting of the study results. LM and RV wrote the first draft of the  
39  
40 manuscript. All authors provided feedback on subsequent drafts and approved the final manuscript.  
41  
42  
43  
44  
45  
46

### 47 *Funding*

48  
49 The *Brain Games* study is funded by an Australian Rotary Health Postdoctoral Fellowship.  
50  
51 Australian Rotary Health had no role in the design of the study or the collection, analysis, and  
52  
53 interpretation of data and in writing the manuscript.  
54  
55  
56  
57  
58  
59  
60

1  
2  
3  
4  
5  
6  
7  
8  
9  
10  
11  
12  
13  
14  
15  
16  
17  
18  
19  
20  
21  
22  
23  
24  
25  
26  
27  
28  
29  
30  
31  
32  
33  
34  
35  
36  
37  
38  
39  
40  
41  
42  
43  
44  
45  
46  
47  
48  
49  
50  
51  
52  
53  
54  
55  
56  
57  
58  
59  
60

*Competing interests*

The authors declare that they have no competing interests.

For peer review only

## References

1. Murray, C.J., et al., *Disability-adjusted life years (DALYs) for 291 diseases and injuries in 21 regions, 1990–2010: a systematic analysis for the Global Burden of Disease Study 2010*. The Lancet, 2013. **380**(9859): p. 2197-2223.
2. Merikangas, K.R., et al., *Lifetime prevalence of mental disorders in US adolescents: results from the National Comorbidity Survey Replication-Adolescent Supplement (NCS-A)*. Journal of the American Academy of Child & Adolescent Psychiatry, 2010. **49**(10): p. 980-989.
3. Kessler, R., et al., *Lifetime co-morbidity of DSM-IV disorders in the US National Comorbidity Survey Replication Adolescent Supplement (NCS-A)*. Psychological Medicine, 2012. **42**(09): p. 1997-2010.
4. Lewis, D.A., *Cortical circuit dysfunction and cognitive deficits in schizophrenia—implications for preemptive interventions*. European Journal of Neuroscience, 2012. **35**(12): p. 1871-1878.
5. Giedd, J.N., M. Keshavan, and T. Paus, *Why do many psychiatric disorders emerge during adolescence?* Nature Reviews Neuroscience, 2008. **9**(12): p. 947-957.
6. Crews, F., J. He, and C. Hodge, *Adolescent cortical development: a critical period of vulnerability for addiction*. Pharmacology, Biochemistry & Behavior, 2007. **86**(2): p. 189-99.
7. Vinogradov, S., M. Fisher, and E. de Villers-Sidani, *Cognitive training for impaired neural systems in neuropsychiatric illness*. Neuropsychopharmacology, 2011. **37**(1): p. 43-76.
8. Goodkind, M., et al., *Identification of a common neurobiological substrate for mental illness*. JAMA psychiatry, 2015. **72**(4): p. 305-315.

- 1  
2  
3 9. Shanmugan, S., et al., *Common and dissociable mechanisms of executive system*  
4  
5 *dysfunction across psychiatric disorders in youth*. American journal of psychiatry,  
6  
7 2016. **173**(5): p. 517-526.  
8
- 9  
10 10. Valkanova, V., R.E. Rodriguez, and K.P. Ebmeier, *Mind over matter-what do we*  
11  
12 *know about neuroplasticity in adults?* International Psychogeriatrics, 2014. **26**(6): p.  
13  
14 891.  
15
- 16 11. Cramer, S.C., et al., *Harnessing neuroplasticity for clinical applications*. Brain, 2011.  
17  
18 **134**(6): p. 1591-1609.  
19
- 20 12. Keshavan, M.S., et al., *Cognitive training in mental disorders: update and future*  
21  
22 *directions*. American Journal of Psychiatry, 2014. **171**(5): p. 510-522.  
23
- 24 13. Revell, E.R., et al., *A systematic review and meta-analysis of cognitive remediation in*  
25  
26 *early schizophrenia*. Schizophrenia research, 2015. **168**(1): p. 213-222.  
27
- 28 14. Lee, R., et al., *Cognitive remediation improves memory and psychosocial functioning*  
29  
30 *in first-episode psychiatric out-patients*. Psychological medicine, 2013. **43**(06): p.  
31  
32 1161-1173.  
33
- 34 15. Wykes, T., et al., *A meta-analysis of cognitive remediation for schizophrenia:*  
35  
36 *methodology and effect sizes*. American Journal of Psychiatry, 2011. **168**(5): p. 472-  
37  
38 485.  
39
- 40 16. Medalia, A. and A.M. Saperstein, *Does cognitive remediation for schizophrenia*  
41  
42 *improve functional outcomes?* Current Opinion in Psychiatry, 2013. **26**(2): p. 151-  
43  
44 157.  
45
- 46 17. Hetrick, S., et al., *Early identification and intervention in depressive disorders:*  
47  
48 *towards a clinical staging model*. Psychotherapy and psychosomatics, 2008. **77**(5): p.  
49  
50 263-270.  
51  
52  
53  
54  
55  
56  
57  
58  
59  
60

- 1  
2  
3  
4  
5  
6  
7  
8  
9  
10  
11  
12  
13  
14  
15  
16  
17  
18  
19  
20  
21  
22  
23  
24  
25  
26  
27  
28  
29  
30  
31  
32  
33  
34  
35  
36  
37  
38  
39  
40  
41  
42  
43  
44  
45  
46  
47  
48  
49  
50  
51  
52  
53  
54  
55  
56  
57  
58  
59  
60
18. McGorry, P.D., *Staging in neuropsychiatry: a heuristic model for understanding, prevention and treatment*. Neurotoxicity research, 2010. **18**(3-4): p. 244-255.
  19. Roughan, L. and J.A. Hadwin, *The impact of working memory training in young people with social, emotional and behavioural difficulties*. Learning and Individual Differences, 2011. **21**(6): p. 759-764.
  20. Hooker, C.I., et al., *A pilot study of cognitive training in clinical high risk for psychosis: initial evidence of cognitive benefit*. Schizophrenia research, 2014. **157**: p. 314.
  21. Piskulic, D., et al., *Pilot study of cognitive remediation therapy on cognition in young people at clinical high risk of psychosis*. Psychiatry research, 2015. **225**(1): p. 93-98.
  22. Shipstead, Z., T.S. Redick, and R.W. Engle, *Is working memory training effective?* Psychological bulletin, 2012. **138**(4): p. 628.
  23. Newton, N.C., et al., *The validity of the Substance Use Risk Profile Scale (SURPS) among Australian adolescents*. Addictive behaviors, 2016. **53**: p. 23-30.
  24. Castellanos, N. and P. Conrod, *Brief interventions targeting personality risk factors for adolescent substance misuse reduce depression, panic and risk-taking behaviours*. Journal of Mental Health, 2006. **15**(6): p. 645-658.
  25. Goodman, R., *Psychometric properties of the strengths and difficulties questionnaire*. Journal of the American Academy of Child & Adolescent Psychiatry, 2001. **40**(11): p. 1337-1345.
  26. Hawes, D.J. and M.R. Dadds, *Australian data and psychometric properties of the Strengths and Difficulties Questionnaire*. Australian and New Zealand Journal of Psychiatry, 2004. **38**(8): p. 644-651.

- 1  
2  
3 27. Woicik, P.A., et al., *The substance use risk profile scale: A scale measuring traits*  
4 *linked to reinforcement-specific substance use profiles*. Addictive behaviors, 2009.  
5  
6 **34**(12): p. 1042-1055.  
7  
8  
9  
10 28. Castellanos-Ryan, N., et al., *Sensitivity and specificity of a brief personality screening*  
11 *instrument in predicting future substance use, emotional, and behavioral problems:*  
12 *18-month predictive validity of the substance use risk profile scale*. Alcoholism:  
13 *Clinical and Experimental Research*, 2013. **37**(s1): p. E281-E290.  
14  
15  
16  
17  
18 29. Sheehan, D.V., et al., *Reliability and validity of the mini international*  
19 *neuropsychiatric interview for children and adolescents (MINI-KID)*. The Journal of  
20 *clinical psychiatry*, 2010. **71**(3): p. 313-326.  
21  
22  
23  
24  
25 30. Lecrubier, Y., et al., *The Mini International Neuropsychiatric Interview (MINI). A*  
26 *short diagnostic structured interview: reliability and validity according to the CIDI*.  
27 *European psychiatry*, 1997. **12**(5): p. 224-231.  
28  
29  
30  
31  
32 31. Sheehan, D., et al., *The validity of the Mini International Neuropsychiatric Interview*  
33 *(MINI) according to the SCID-P and its reliability*. *European Psychiatry*, 1997. **12**(5):  
34 p. 232-241.  
35  
36  
37  
38 32. Goodman, R., H. Meltzer, and V. Bailey, *The Strengths and Difficulties*  
39 *Questionnaire: A pilot study on the validity of the self-report version*. *European child*  
40 *& adolescent psychiatry*, 1998. **7**(3): p. 125-130.  
41  
42  
43  
44 33. Kimber, M., J. Rehm, and M.A. Ferro, *Measurement Invariance of the WHODAS 2.0*  
45 *in a population-based sample of youth*. *PloS one*, 2015. **10**(11): p. e0142385.  
46  
47  
48  
49 34. McBride, N., et al., *Harm minimization in school drug education: final results of the*  
50 *School Health and Alcohol Harm Reduction Project (SHAHRP)*. *Addiction*, 2004.  
51 **99**(3): p. 278-291.  
52  
53  
54  
55  
56  
57  
58  
59  
60

- 1  
2  
3 35. Jaeggi, S.M., et al., *The concurrent validity of the N-back task as a working memory*  
4 *measure*. Memory, 2010. **18**(4): p. 394-412.  
5  
6  
7 36. Reitan, R.M., *Validity of the Trail Making Test as an indicator of organic brain*  
8 *damage*. Perceptual and motor skills, 1958. **8**(3): p. 271-276.  
9  
10  
11 37. Stroop, J.R., *Studies of interference in serial verbal reactions*. Journal of experimental  
12 *psychology*, 1935. **18**(6): p. 643.  
13  
14  
15 38. Teesson, M., et al., *The CLIMATE schools combined study: a cluster randomised*  
16 *controlled trial of a universal Internet-based prevention program for youth substance*  
17 *misuse, depression and anxiety*. BMC psychiatry, 2014. **14**(1): p. 32.  
18  
19  
20  
21 39. Faggiano, F., et al., *School-based prevention for illicit drugs use: A systematic review*.  
22 *Preventive medicine*, 2008. **46**(5): p. 385-396.  
23  
24  
25  
26  
27  
28  
29  
30  
31  
32  
33  
34  
35  
36  
37  
38  
39  
40  
41  
42  
43  
44  
45  
46  
47  
48  
49  
50  
51  
52  
53  
54  
55  
56  
57  
58  
59  
60



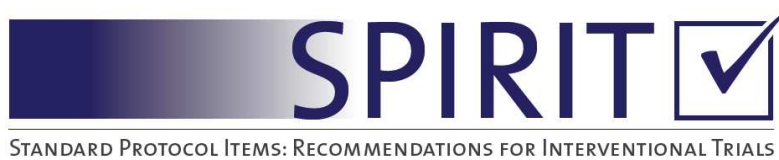

SPIRIT 2013 Checklist: Recommended items to address in a clinical trial protocol and related documents\*

| Section/item                      | Item No | Description                                                                                                                                                                                                                                                                                      |
|-----------------------------------|---------|--------------------------------------------------------------------------------------------------------------------------------------------------------------------------------------------------------------------------------------------------------------------------------------------------|
| <b>Administrative information</b> |         |                                                                                                                                                                                                                                                                                                  |
| Title                             | 1       | Descriptive title identifying the study design, population, interventions, and, if applicable, trial acronym (pg 1)                                                                                                                                                                              |
| Trial registration                | 2a      | Trial identifier and registry name. If not yet registered, name of intended registry (pg 2)                                                                                                                                                                                                      |
|                                   | 2b      | All items from the World Health Organization Trial Registration Data Set (pg 2)                                                                                                                                                                                                                  |
| Protocol version                  | 3       | Date and version identifier (footer)                                                                                                                                                                                                                                                             |
| Funding                           | 4       | Sources and types of financial, material, and other support (pg 16)                                                                                                                                                                                                                              |
| Roles and responsibilities        | 5a      | Names, affiliations, and roles of protocol contributors (pg 1 & 15)                                                                                                                                                                                                                              |
|                                   | 5b      | Name and contact information for the trial sponsor (N/A)                                                                                                                                                                                                                                         |
|                                   | 5c      | Role of study sponsor and funders, if any, in study design; collection, management, analysis, and interpretation of data; writing of the report; and the decision to submit the report for publication, including whether they will have ultimate authority over any of these activities (pg 16) |
|                                   | 5d      | Composition, roles, and responsibilities of the coordinating centre, steering committee, endpoint adjudication committee, data management team, and other individuals or groups overseeing the trial, if applicable (see Item 21a for data monitoring committee) (N/A)                           |
| <b>Introduction</b>               |         |                                                                                                                                                                                                                                                                                                  |
| Background and rationale          | 6a      | Description of research question and justification for undertaking the trial, including summary of relevant studies (published and unpublished) examining benefits and harms for each intervention (pg 4-8)                                                                                      |
|                                   | 6b      | Explanation for choice of comparators (pg 11)                                                                                                                                                                                                                                                    |
| Objectives                        | 7       | Specific objectives or hypotheses (pg 8)                                                                                                                                                                                                                                                         |

1  
2  
3  
4  
5  
6  
7  
8  
9  
10  
11  
12  
13  
14  
15  
16  
17  
18  
19  
20  
21  
22  
23  
24  
25  
26  
27  
28  
29  
30  
31  
32  
33  
34  
35  
36  
37  
38  
39  
40  
41  
42  
43  
44  
45  
46  
47  
48  
49  
50  
51  
52  
53  
54  
55  
56  
57  
58  
59  
60

|              |   |                                                                                                                                                                                                                  |
|--------------|---|------------------------------------------------------------------------------------------------------------------------------------------------------------------------------------------------------------------|
| Trial design | 8 | Description of trial design including type of trial (eg, parallel group, crossover, factorial, single group), allocation ratio, and framework (eg, superiority, equivalence, noninferiority, exploratory) (pg 8) |
|--------------|---|------------------------------------------------------------------------------------------------------------------------------------------------------------------------------------------------------------------|

### Methods: Participants, interventions, and outcomes

|               |   |                                                                                                                                                                                            |
|---------------|---|--------------------------------------------------------------------------------------------------------------------------------------------------------------------------------------------|
| Study setting | 9 | Description of study settings (eg, community clinic, academic hospital) and list of countries where data will be collected. Reference to where list of study sites can be obtained (10-11) |
|---------------|---|--------------------------------------------------------------------------------------------------------------------------------------------------------------------------------------------|

|                      |    |                                                                                                                                                                                                        |
|----------------------|----|--------------------------------------------------------------------------------------------------------------------------------------------------------------------------------------------------------|
| Eligibility criteria | 10 | Inclusion and exclusion criteria for participants. If applicable, eligibility criteria for study centres and individuals who will perform the interventions (eg, surgeons, psychotherapists) (pg 9-10) |
|----------------------|----|--------------------------------------------------------------------------------------------------------------------------------------------------------------------------------------------------------|

|               |     |                                                                                                                                   |
|---------------|-----|-----------------------------------------------------------------------------------------------------------------------------------|
| Interventions | 11a | Interventions for each group with sufficient detail to allow replication, including how and when they will be administered (p 11) |
|---------------|-----|-----------------------------------------------------------------------------------------------------------------------------------|

|  |     |                                                                                                                                                                                                       |
|--|-----|-------------------------------------------------------------------------------------------------------------------------------------------------------------------------------------------------------|
|  | 11b | Criteria for discontinuing or modifying allocated interventions for a given trial participant (eg, drug dose change in response to harms, participant request, or improving/worsening disease) (p 11) |
|--|-----|-------------------------------------------------------------------------------------------------------------------------------------------------------------------------------------------------------|

|  |     |                                                                                                                                                          |
|--|-----|----------------------------------------------------------------------------------------------------------------------------------------------------------|
|  | 11c | Strategies to improve adherence to intervention protocols, and any procedures for monitoring adherence (eg, drug tablet return, laboratory tests) (p 11) |
|--|-----|----------------------------------------------------------------------------------------------------------------------------------------------------------|

|  |     |                                                                                                      |
|--|-----|------------------------------------------------------------------------------------------------------|
|  | 11d | Relevant concomitant care and interventions that are permitted or prohibited during the trial (p 11) |
|--|-----|------------------------------------------------------------------------------------------------------|

|          |    |                                                                                                                                                                                                                                                                                                                                                                                      |
|----------|----|--------------------------------------------------------------------------------------------------------------------------------------------------------------------------------------------------------------------------------------------------------------------------------------------------------------------------------------------------------------------------------------|
| Outcomes | 12 | Primary, secondary, and other outcomes, including the specific measurement variable (eg, systolic blood pressure), analysis metric (eg, change from baseline, final value, time to event), method of aggregation (eg, median, proportion), and time point for each outcome. Explanation of the clinical relevance of chosen efficacy and harm outcomes is strongly recommended (p 9) |
|----------|----|--------------------------------------------------------------------------------------------------------------------------------------------------------------------------------------------------------------------------------------------------------------------------------------------------------------------------------------------------------------------------------------|

|                      |    |                                                                                                                                                                                            |
|----------------------|----|--------------------------------------------------------------------------------------------------------------------------------------------------------------------------------------------|
| Participant timeline | 13 | Time schedule of enrolment, interventions (including any run-ins and washouts), assessments, and visits for participants. A schematic diagram is highly recommended (see Figure) (p 11-12) |
|----------------------|----|--------------------------------------------------------------------------------------------------------------------------------------------------------------------------------------------|

|             |    |                                                                                                                                                                                             |
|-------------|----|---------------------------------------------------------------------------------------------------------------------------------------------------------------------------------------------|
| Sample size | 14 | Estimated number of participants needed to achieve study objectives and how it was determined, including clinical and statistical assumptions supporting any sample size calculations (p 9) |
|-------------|----|---------------------------------------------------------------------------------------------------------------------------------------------------------------------------------------------|

|             |    |                                                                                            |
|-------------|----|--------------------------------------------------------------------------------------------|
| Recruitment | 15 | Strategies for achieving adequate participant enrolment to reach target sample size (p 10) |
|-------------|----|--------------------------------------------------------------------------------------------|

### Methods: Assignment of interventions (for controlled trials)

Allocation:

|    |                |     |                                                                         |
|----|----------------|-----|-------------------------------------------------------------------------|
| 1  |                |     |                                                                         |
| 2  | Sequence       | 16a | Method of generating the allocation sequence (eg, computer-             |
| 3  | generation     |     | generated random numbers), and list of any factors for stratification.  |
| 4  |                |     | To reduce predictability of a random sequence, details of any planned   |
| 5  |                |     | restriction (eg, blocking) should be provided in a separate document    |
| 6  |                |     | that is unavailable to those who enrol participants or assign           |
| 7  |                |     | interventions (pg 10-11)                                                |
| 8  |                |     |                                                                         |
| 9  | Allocation     | 16b | Mechanism of implementing the allocation sequence (eg, central          |
| 10 | concealment    |     | telephone; sequentially numbered, opaque, sealed envelopes),            |
| 11 | mechanism      |     | describing any steps to conceal the sequence until interventions are    |
| 12 |                |     | assigned (pg 10-11)                                                     |
| 13 |                |     |                                                                         |
| 14 | Implementation | 16c | Who will generate the allocation sequence, who will enrol participants, |
| 15 |                |     | and who will assign participants to interventions (pg 10-11)            |
| 16 |                |     |                                                                         |
| 17 | Blinding       | 17a | Who will be blinded after assignment to interventions (eg, trial        |
| 18 | (masking)      |     | participants, care providers, outcome assessors, data analysts), and    |
| 19 |                |     | how (pg 10-11)                                                          |
| 20 |                |     |                                                                         |
| 21 |                | 17b | If blinded, circumstances under which unblinding is permissible, and    |
| 22 |                |     | procedure for revealing a participant's allocated intervention during   |
| 23 |                |     | the trial (pg 10-11)                                                    |
| 24 |                |     |                                                                         |
| 25 |                |     |                                                                         |
| 26 |                |     |                                                                         |

### Methods: Data collection, management, and analysis

|    |                 |     |                                                                          |
|----|-----------------|-----|--------------------------------------------------------------------------|
| 27 |                 |     |                                                                          |
| 28 | Data collection | 18a | Plans for assessment and collection of outcome, baseline, and other      |
| 29 | methods         |     | trial data, including any related processes to promote data quality (eg, |
| 30 |                 |     | duplicate measurements, training of assessors) and a description of      |
| 31 |                 |     | study instruments (eg, questionnaires, laboratory tests) along with      |
| 32 |                 |     | their reliability and validity, if known. Reference to where data        |
| 33 |                 |     | collection forms can be found, if not in the protocol (pg 12-14)         |
| 34 |                 |     |                                                                          |
| 35 |                 | 18b | Plans to promote participant retention and complete follow-up,           |
| 36 |                 |     | including list of any outcome data to be collected for participants who  |
| 37 |                 |     | discontinue or deviate from intervention protocols (pg 11)               |
| 38 |                 |     |                                                                          |
| 39 | Data            | 19  | Plans for data entry, coding, security, and storage, including any       |
| 40 | management      |     | related processes to promote data quality (eg, double data entry;        |
| 41 |                 |     | range checks for data values). Reference to where details of data        |
| 42 |                 |     | management procedures can be found, if not in the protocol (p. 14)       |
| 43 |                 |     |                                                                          |
| 44 | Statistical     | 20a | Statistical methods for analysing primary and secondary outcomes.        |
| 45 | methods         |     | Reference to where other details of the statistical analysis plan can be |
| 46 |                 |     | found, if not in the protocol (pg 14-15)                                 |
| 47 |                 |     |                                                                          |
| 48 |                 | 20b | Methods for any additional analyses (eg, subgroup and adjusted           |
| 49 |                 |     | analyses) (pg 14-15)                                                     |
| 50 |                 |     |                                                                          |
| 51 |                 | 20c | Definition of analysis population relating to protocol non-adherence     |
| 52 |                 |     | (eg, as randomised analysis), and any statistical methods to handle      |
| 53 |                 |     | missing data (eg, multiple imputation) (pg 14)                           |
| 54 |                 |     |                                                                          |
| 55 |                 |     |                                                                          |
| 56 |                 |     |                                                                          |
| 57 |                 |     |                                                                          |
| 58 |                 |     |                                                                          |
| 59 |                 |     |                                                                          |
| 60 |                 |     |                                                                          |

**Methods: Monitoring**

|                 |     |                                                                                                                                                                                                                                                                                                                                               |
|-----------------|-----|-----------------------------------------------------------------------------------------------------------------------------------------------------------------------------------------------------------------------------------------------------------------------------------------------------------------------------------------------|
| Data monitoring | 21a | Composition of data monitoring committee (DMC); summary of its role and reporting structure; statement of whether it is independent from the sponsor and competing interests; and reference to where further details about its charter can be found, if not in the protocol. Alternatively, an explanation of why a DMC is not needed (pg 11) |
|                 | 21b | Description of any interim analyses and stopping guidelines, including who will have access to these interim results and make the final decision to terminate the trial (n/a)                                                                                                                                                                 |
| Harms           | 22  | Plans for collecting, assessing, reporting, and managing solicited and spontaneously reported adverse events and other unintended effects of trial interventions or trial conduct (pg 11)                                                                                                                                                     |
| Auditing        | 23  | Frequency and procedures for auditing trial conduct, if any, and whether the process will be independent from investigators and the sponsor (n/a)                                                                                                                                                                                             |

**Ethics and dissemination**

|                               |     |                                                                                                                                                                                                                                          |
|-------------------------------|-----|------------------------------------------------------------------------------------------------------------------------------------------------------------------------------------------------------------------------------------------|
| Research ethics approval      | 24  | Plans for seeking research ethics committee/institutional review board (REC/IRB) approval (pg 15)                                                                                                                                        |
| Protocol amendments           | 25  | Plans for communicating important protocol modifications (eg, changes to eligibility criteria, outcomes, analyses) to relevant parties (eg, investigators, REC/IRBs, trial participants, trial registries, journals, regulators) (pg 15) |
| Consent or assent             | 26a | Who will obtain informed consent or assent from potential trial participants or authorised surrogates, and how (see Item 32) (pg 10)                                                                                                     |
|                               | 26b | Additional consent provisions for collection and use of participant data and biological specimens in ancillary studies, if applicable (n/a)                                                                                              |
| Confidentiality               | 27  | How personal information about potential and enrolled participants will be collected, shared, and maintained in order to protect confidentiality before, during, and after the trial (pg 14)                                             |
| Declaration of interests      | 28  | Financial and other competing interests for principal investigators for the overall trial and each study site (pg 16-17)                                                                                                                 |
| Access to data                | 29  | Statement of who will have access to the final trial dataset, and disclosure of contractual agreements that limit such access for investigators (pg 15)                                                                                  |
| Ancillary and post-trial care | 30  | Provisions, if any, for ancillary and post-trial care, and for compensation to those who suffer harm from trial participation (n/a)                                                                                                      |

|    |               |     |                                                                              |
|----|---------------|-----|------------------------------------------------------------------------------|
| 1  |               |     |                                                                              |
| 2  |               |     |                                                                              |
| 3  | Dissemination | 31a | Plans for investigators and sponsor to communicate trial results to          |
| 4  | policy        |     | participants, healthcare professionals, the public, and other relevant       |
| 5  |               |     | groups (eg, via publication, reporting in results databases, or other        |
| 6  |               |     | data sharing arrangements), including any publication restrictions (pg       |
| 7  |               |     | 15)                                                                          |
| 8  |               | 31b | Authorship eligibility guidelines and any intended use of professional       |
| 9  |               |     | writers (pg 15)                                                              |
| 10 |               |     |                                                                              |
| 11 |               | 31c | Plans, if any, for granting public access to the full protocol, participant- |
| 12 |               |     | level dataset, and statistical code (pg 15)                                  |
| 13 |               |     |                                                                              |
| 14 |               |     |                                                                              |

### Appendices

|    |                  |    |                                                                          |
|----|------------------|----|--------------------------------------------------------------------------|
| 15 |                  |    |                                                                          |
| 16 |                  |    |                                                                          |
| 17 | Informed consent | 32 | Model consent form and other related documentation given to              |
| 18 | materials        |    | participants and authorised surrogates (see Appendix)                    |
| 19 |                  |    |                                                                          |
| 20 | Biological       | 33 | Plans for collection, laboratory evaluation, and storage of biological   |
| 21 | specimens        |    | specimens for genetic or molecular analysis in the current trial and for |
| 22 |                  |    | future use in ancillary studies, if applicable (n/a)                     |
| 23 |                  |    |                                                                          |

---

24 \*It is strongly recommended that this checklist be read in conjunction with the SPIRIT 2013  
25 Explanation & Elaboration for important clarification on the items. Amendments to the  
26 protocol should be tracked and dated. The SPIRIT checklist is copyrighted by the SPIRIT  
27 Group under the Creative Commons "[Attribution-NonCommercial-NoDerivs 3.0 Unported](#)"  
28 license.  
29  
30  
31  
32  
33  
34  
35  
36  
37  
38  
39  
40  
41  
42  
43  
44  
45  
46  
47  
48  
49  
50  
51  
52  
53  
54  
55  
56  
57  
58  
59  
60

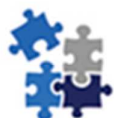

NHMRC CENTRE OF RESEARCH EXCELLENCE  
in MENTAL HEALTH and SUBSTANCE USE

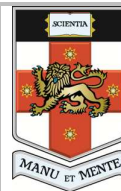

UNSW  
AUSTRALIA

**PARTICIPANT INFORMATION STATEMENT AND CONSENT FORM**

The Brain Games Study  
Dr Louise Newton

| The research study is being carried out by the following researchers: |                                                                                                                            |                                                                |
|-----------------------------------------------------------------------|----------------------------------------------------------------------------------------------------------------------------|----------------------------------------------------------------|
| Role                                                                  | Name                                                                                                                       | Organisation                                                   |
| Chief Investigator                                                    | Dr Louise Newton                                                                                                           | University of New South Wales                                  |
| Co-Investigator/s                                                     | Dr Nicola Gates, Dr Antoinette Hodge & Professor Maree Teesson                                                             | Westmead Children’s Hospital and University of New South Wales |
| Research Funder                                                       | This research is being funded by Australian Rotary Health and the Australian National Health and Medical Research Council. |                                                                |

**What is the research study about?**

You are invited to take part in this online research study. You have been invited because of certain behaviours or emotions you reported in response to our questionnaire.

To participate in this research study you need to meet the following inclusion criteria:

1) the experience of risky behaviours, high anxiety or negative emotions; 2) be able to access the internet readily via a desktop or laptop computer (either in your home, or willingness to use public library/other suitable venue with internet access); 3) be willing to provide current email address and phone number. You will not be able to take part in this study if you meet criteria for an anxiety, mood or substance use disorder, if you take certain medications, or have certain medical conditions.

The research study is aiming to determine whether brain training in the form of online games (“Brain Games”) can reduce risky behaviours, anxiety and negative emotions which may lead to mental illness in the future.

**Do I have to take part in this research study?**

This Participant Information Statement tells you about the research study. It explains the research tasks involved. Knowing what is involved will help you decide if you want to take part in the research.

Please read this information carefully. If there is anything that you don’t understand or want to know more about please feel free to contact the research team. Before deciding whether or not to take part, you might want to talk about it with a relative or friend.

If you decide you want to take part in the research study, you will be asked to:

- Type your name into the boxes at the bottom of this consent form ;
- Keep a copy of this Participant Information Statement;

**What does participation in this research require, and are there any risks involved?**

Before you begin any activities we need to do ask some more questions to understand whether it is ok for you to take part. In order to do this we will contact you by telephone and ask you to answer questions about your feelings and behaviours, including substance use. It is expected that these questions will take about half an hour for you to complete. If you are not suitable for the study, we will let you know over the telephone, provide you with information for services should you need them, and withdraw all your data from the study.

If you are suitable for the study, you will be randomly assigned to one of two different training groups. Both groups will be asked to complete an online Brain Games program. We will ask you to do the program for a maximum of one hour every weekday for a total of five weeks. In total, the program will take a maximum of 25 hours. The Brain Games program is like a computer game, and we expect that you will find the Brain Games sessions fun as well as challenging. Before and after you have completed your online Brain Games sessions we will ask you to complete online and telephone-

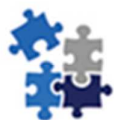

NHMRC CENTRE OF RESEARCH EXCELLENCE  
in MENTAL HEALTH and SUBSTANCE USE

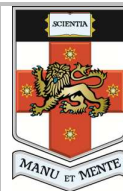

UNSW  
AUSTRALIA

## PARTICIPANT INFORMATION STATEMENT AND CONSENT FORM

The Brain Games Study  
Dr Louise Mewton

administered questionnaires about your feelings and behaviours, including substance use, as well as some tasks that will tell us about your different abilities. We will also ask you to complete these same questionnaires and tasks 3 months, 6 months and 12 months after you have finished the Brain Games program. We expect that each set of questionnaires and tasks will take up to an hour to complete so we expect you will spend a total of 5 hours doing these over the course of a year. At the end of the study we want to compare the two different Brain Games programs to see whether one is better than the other in terms improving any negative feelings or risky behaviours you might be experiencing. At the moment, we are not sure if one program is better than the other, or whether you will benefit from participating in this study.

We do not expect there to be any risks associated with completing the Brain Games program. It is possible you might experience some distress when answering the questionnaires that ask about sensitive topics. If you do experience distress you will be encouraged to contact the research team and you will be given contact information for services equipped to deal with any distress you might be experiencing.

### **Will I be paid to participate in this project?**

You will be reimbursed \$50 for taking the time to complete the Brain Games program. After you have completed all the questionnaires you will also go into a draw to win an iPad.

### **What are the possible benefits to participation?**

We hope to use information we get from this research study to benefit others who might also behave in risky ways or experience anxiety or negative emotions.

### **What will happen to information about me?**

By typing your name into this form, you consent to the research team collecting and using information from the questionnaire you complete for the research study. We will keep your confidential data for 7 years. Any information obtained in connection with this research study that can identify you will remain confidential. This project will use an external site to create, collect and analyse data collected in a questionnaire format. The site we are using is [www.braingames.org.au](http://www.braingames.org.au). If you agree to participate in this study, the responses you provide to the questionnaire will be stored on a host server that is used by Indigo hosting. Once we have completed our data collection and analysis, we will import the data we collect to the UNSW server. The data on the Indigo hosting server will then be deleted.

It is anticipated that the results of this research study will be published and/or presented in a variety of forums. In any publication and/or presentation, information will be provided in such a way that your research findings may be published, but you will not be individually identifiable in these publications.

### **How and when will I find out what the results of the research study are?**

You have a right to receive feedback about the overall results of this study. You can tell us that you wish to receive feedback by emailing the study co-ordinator, Dr Louise Mewton ([louisem@unsw.edu.au](mailto:louisem@unsw.edu.au)). This feedback will be in the form of a one page report. You will receive this feedback after the study is finished.

### **What if I want to withdraw from the research study?**

If you do consent to participate, you may withdraw at any time. If you do withdraw, you will be asked to complete and sign the 'Withdrawal of Consent Form' which is provided at the end of this document. Alternatively you can contact the research team and tell them you no longer want to participate.



NHMRC CENTRE OF RESEARCH EXCELLENCE  
in MENTAL HEALTH and SUBSTANCE USE



UNSW  
AUSTRALIA

**PARTICIPANT INFORMATION STATEMENT AND CONSENT FORM**

The Brain Games Study  
Dr Louise Mewton

If you decide to withdraw from the study, we will not collect any more information from you. Please let us know at the time when you withdraw what you would like us to do with the information we have collected about you up to that point. If you wish your information will be removed from our study records and will not be included in the study results, up to the point that we have analysed and published the results.

**What should I do if I have further questions about my involvement in the research study?**

The person you may need to contact will depend on the nature of your query. If you want any further information concerning this project or if you have any problems which may be related to your involvement in the project, you can contact the following member/s of the research team:

**Research Team Contact**

|                  |                                                              |
|------------------|--------------------------------------------------------------|
| <b>Name</b>      | Dr Louise Mewton                                             |
| <b>Position</b>  | Research Officer                                             |
| <b>Telephone</b> | 02 8936 1131                                                 |
| <b>Email</b>     | <a href="mailto:louisem@unsw.edu.au">louisem@unsw.edu.au</a> |

If at any stage during the project you become distressed or require additional support from someone not involved in the research please call:

**Contact for feelings of distress**

|                          |                                                              |
|--------------------------|--------------------------------------------------------------|
| <b>Name/Organisation</b> | Kids Helpline                                                |
| <b>Telephone</b>         | 1800 551 800                                                 |
| <b>Email</b>             | <a href="http://www.kidshelp.com.au">www.kidshelp.com.au</a> |

**What if I have a complaint or any concerns about the research study?**

If you have any complaints about any aspect of the project, the way it is being conducted, then you may contact:

**Complaints Contact**

|                            |                                                                      |
|----------------------------|----------------------------------------------------------------------|
| <b>Position</b>            | Human Research Ethics Coordinator                                    |
| <b>Telephone</b>           | + 61 2 9385 6222                                                     |
| <b>Email</b>               | <a href="mailto:humanethics@unsw.edu.au">humanethics@unsw.edu.au</a> |
| <b>HC Reference Number</b> | HC15094                                                              |

**Consent Form – Participant providing own consent**

**Declaration by the participant**

- I have read the Participant Information Sheet or someone has read it to me in a language that I understand;
- I understand the purposes, study tasks and risks of the research described in the project;
- I have had an opportunity to ask questions and I am satisfied with the answers I have received;
- I freely agree to participate in this research study as described and understand that I am free to withdraw at any time during the project and withdrawal will not affect my relationship with any of the named organisations and/or research team members;



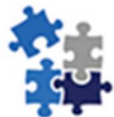

NHMRC CENTRE OF RESEARCH EXCELLENCE  
in MENTAL HEALTH and SUBSTANCE USE



UNSW  
AUSTRALIA

**PARTICIPANT INFORMATION STATEMENT AND CONSENT FORM**

The Brain Games Study

Dr Louise Newton

I understand that I will be given a signed copy of this document to keep;

**Participant Signature**

|                                                               |  |
|---------------------------------------------------------------|--|
| Name of Participant (please type)                             |  |
| Please type name again (this will be taken as your signature) |  |
| Date                                                          |  |

**Declaration by Researcher\***

I have given a verbal explanation of the research study, its study activities and risks and I believe that the participant has understood that explanation.

**Researcher Signature\***

|                                    |  |
|------------------------------------|--|
| Name of Participant (please print) |  |
| Signature of Research Participant  |  |
| Date                               |  |

\*An appropriately qualified member of the research team must provide the explanation of, and information concerning the research study.

**Note: All parties signing the consent section must date their own signature.**

Peer review only



NHMRC CENTRE OF RESEARCH EXCELLENCE  
in MENTAL HEALTH and SUBSTANCE USE



UNSW  
AUSTRALIA

**PARTICIPANT INFORMATION STATEMENT AND CONSENT FORM**

The Brain Games Study  
Dr Louise Mewton

**Form for Withdrawal of Participation**

I wish to **WITHDRAW** my consent to participate in the research proposal described above and understand that such withdrawal **WILL NOT** affect my relationship with The University of New South Wales.

**Participant Signature**

|                                                         |  |
|---------------------------------------------------------|--|
| Name of Participant<br>(please type)                    |  |
| Signature of Research<br>Participant (please type name) |  |
| Date                                                    |  |

**The section for Withdrawal of Participation should be forwarded to:**

|          |                                                              |
|----------|--------------------------------------------------------------|
| CI Name: | Louise Mewton                                                |
| Email:   | <a href="mailto:louisem@unsw.edu.au">louisem@unsw.edu.au</a> |
| Phone:   | 02 8936 1131                                                 |

view only

# BMJ Open

## The Brain Games study: Protocol for a randomised controlled trial of computerised cognitive training for preventing mental illness in adolescents with high-risk personality styles

|                                 |                                                                                                                                                                                                                                                                                                                                                                                                                                                                                                                                                 |
|---------------------------------|-------------------------------------------------------------------------------------------------------------------------------------------------------------------------------------------------------------------------------------------------------------------------------------------------------------------------------------------------------------------------------------------------------------------------------------------------------------------------------------------------------------------------------------------------|
| Journal:                        | <i>BMJ Open</i>                                                                                                                                                                                                                                                                                                                                                                                                                                                                                                                                 |
| Manuscript ID                   | bmjopen-2017-017721.R1                                                                                                                                                                                                                                                                                                                                                                                                                                                                                                                          |
| Article Type:                   | Protocol                                                                                                                                                                                                                                                                                                                                                                                                                                                                                                                                        |
| Date Submitted by the Author:   | 13-Jul-2017                                                                                                                                                                                                                                                                                                                                                                                                                                                                                                                                     |
| Complete List of Authors:       | Mewton, Louise; University of New South Wales, National Drug and Alcohol Research Centre<br>Hodge, Antoinette; Child Development Unit, The Children's Hospital at Westmead<br>Gates, Nicola; University of New South Wales, Centre for Healthy Brain Aging<br>Visontay, Rachel; University of New South Wales - Randwick Campus, National Drug and Alcohol Research Centre<br>Teesson, Maree; University of New South Wales, NHMRC Centre for Research Excellence in Mental Health and Substance Use, National Drug and Alcohol Research Centre |
| <b>Primary Subject Heading</b>: | Mental health                                                                                                                                                                                                                                                                                                                                                                                                                                                                                                                                   |
| Secondary Subject Heading:      | Public health                                                                                                                                                                                                                                                                                                                                                                                                                                                                                                                                   |
| Keywords:                       | cognitive training, mental illness, adolescence, prevention, internet-delivered                                                                                                                                                                                                                                                                                                                                                                                                                                                                 |
|                                 |                                                                                                                                                                                                                                                                                                                                                                                                                                                                                                                                                 |

SCHOLARONE™  
Manuscripts

1  
2  
3 **The *Brain Games* study: Protocol for a randomised controlled trial of**  
4 **computerised cognitive training for preventing mental illness in adolescents**  
5  
6 **with high-risk personality styles**  
7  
8  
9

10 Mewton, L<sup>1</sup>., Hodge, A<sup>2</sup>., Gates, N<sup>3</sup>., Visontay, R<sup>4</sup>. & Teesson, M<sup>5</sup>.

11  
12  
13 <sup>1</sup> Centre of Research Excellence in Mental Health and Substance Use, National Drug and Alcohol  
14 Research Centre, University of New South Wales, NSW, Randwick 2031. Email:

15  
16  
17  
18  
19  
20  
21  
22  
23  
24  
25  
26  
27  
28  
29  
30  
31  
32  
33  
34  
35  
36  
37  
38  
39  
40  
41  
42  
43  
44  
45  
46  
47  
48  
49  
50  
51  
52  
53  
54  
55  
56  
57  
58  
59  
60

louisem@unsw.edu.au

<sup>2</sup> Child Development Unit, The Children's Hospital at Westmead, Westmead, NSW, 2145. Email:  
antoINETte.hodge@health.nsw.gov.au

<sup>3</sup> Centre for Healthy Brain Aging (CHeBA), Medicine, University of New South Wales, NSW  
Randwick, 2031. Email: [nicolagates@bigpond.com](mailto:nicolagates@bigpond.com)

<sup>4</sup> Centre of Research Excellence in Mental Health and Substance Use, National Drug and Alcohol  
Research Centre, University of New South Wales, NSW, Randwick 2031. Email:

r.visontay@unsw.edu.au

<sup>5</sup> Centre of Research Excellence in Mental Health and Substance Use, National Drug and Alcohol  
Research Centre, University of New South Wales, NSW, Randwick 2031. Email:

m.teesson@unsw.edu.au

Correspondence concerning this article should be addressed to Dr Louise Mewton, Centre of  
Research Excellence in Mental Health and Substance Use, National Drug and Alcohol Research  
Centre, University of New South Wales, NSW, Randwick 2031. E-mail: [louisem@unsw.edu.au](mailto:louisem@unsw.edu.au)

## Abstract

*Introduction:* A broad range of mental disorders are now understood as aberrations of normal adolescent brain development. In both adolescents and adults, executive dysfunction has been implicated across a range of mental illnesses and enhancing executive functioning may prove to be a useful prevention strategy for adolescents at risk for a range of psychopathology. *Methods and analysis:* This study will consist of a double-blind, randomised controlled trial with a 12-month follow-up period. Participants will consist of 200 16-24 year olds who are at risk for a range of mental disorders based on personality risk factors, but have not experienced a lifetime mental illness as determined by a structured diagnostic interview. Participants will be randomly allocated to either an intervention group who complete an online cognitive training program specifically targeting executive functioning ability, or a control group who complete an online cognitive training program that has limited executive functioning training potential. Superiority of the executive functioning training program compared with the control training program will be assessed at baseline, post-training, and at 3-, 6- and 12-months follow-up. All assessments will be conducted online. The primary outcome of the study will be general psychopathology as measured by the Strengths and Difficulties Questionnaire (SDQ). Secondary outcomes will include executive functioning ability, day-to-day functioning and alcohol consumption. All analyses will be undertaken using mixed-model repeated measures ANOVA with planned contrasts. *Ethics and dissemination:* Ethics approval has been obtained from the University of New South Wales Human Research Ethics Committee (HC15094). Results of the trial immediately post-treatment and at 12-months follow-up will be submitted for publication in peer-reviewed journals. *Trial registration:* This trial is registered with the Australian and New Zealand Clinical Trials registry, ACTRN12616000127404. Registered 4 February 2016. Data collection ongoing 10 May 2017.

**Key words:** cognitive training, mental illness, adolescence, prevention, internet-delivered

**Strengths and limitations of the study:**

- This study has been designed to demonstrate genuine transfer of skills beyond task-specific learning, a limitation often identified within the cognitive training literature
- This study includes a rigorous active control condition meaning any differences between conditions can be confidently ascribed to improvements in executive functioning rather than other confounding factors
- This study will assess whether any effects are maintained over an extended 12-month follow-up period
- Participant contact will be limited and many processes will be automated, meaning that significant attrition is expected and has been accounted for in sample size calculations
- It may also be that the executive functioning intervention tasks are more engaging than the control tasks by virtue of their complexity and the mental process required for their completion, with subsequent differential attrition rates across the conditions

## Introduction

Anxiety, depressive and substance use disorders frequently have the same risk factors, co-occur and interact in adolescence and young adulthood. Amongst young people (aged 15-24), the top ten causes of burden of disease are dominated by mental illness and substance use [1]. The US National Comorbidity Survey Adolescent Supplement (NCS-A) indicated that approximately 1 in 4 adolescents in the general population met criteria for an anxiety or affective disorder and 1 in 10 adolescents in the general population met criteria for a substance use disorder [2]. The same data indicated that almost a third (29%) of adolescents with one disorder in the general population also met criteria for another disorder, with a mean of 3 psychiatric disorders amongst those with comorbidity [3]. Mental illness is highly prevalent and comorbid in young people, and prevention programs need to be initiated early to reduce the occurrence, cost and significant functional impairment associated with these problems.

Given their typical age of onset, a broad range of mental disorders are increasingly being understood as the result of aberrations of developmental processes that normally occur in the adolescent brain [4-6]. Executive functioning, and its neurobiological substrate, the prefrontal cortex, matures during adolescence [5]. The relatively late maturation of executive functioning is adaptive in most cases, underpinning characteristic adolescent behaviours such as social interaction, risk-taking and sensation seeking which promote successful adult development and independence [6]. However, in some cases it appears that the delayed maturation of prefrontal regulatory regions leads to the development of mental illness, with neurobiological studies indicating a broad deficit in executive functioning which precedes and underpins a range of psychopathology [7]. A recent meta-analysis of neuroimaging studies focusing on a range of psychotic and nonpsychotic mental illnesses, found grey matter loss in the dorsal anterior cingulate, and left and right insula, was common across diagnoses [8]. In a healthy sample, this study also

1  
2  
3 demonstrated that lower grey matter in these regions was found to be associated with deficits in  
4  
5 executive functioning performance. Similarly, another recent functional imaging study focused on  
6  
7 1,129 community youths (mean age 15.5 years) and investigated the relationship between  
8  
9 psychopathology and activation of the executive system during a working memory task [9]. Overall  
10  
11 psychopathology was associated with hypoactivation in the frontal pole, anterior cingulate, anterior  
12  
13 insula and precuneas, implicating a network of executive regions across a range of psychiatric  
14  
15 diagnoses. In both adolescents and adults, executive dysfunction has therefore been implicated  
16  
17 across a range of mental illnesses.  
18  
19

20  
21  
22  
23 Whilst the functional and structural organisation of the human brain was once considered static  
24  
25 after critical developmental periods, it is now evident that neural changes are possible throughout  
26  
27 the lifespan [10]. Experience-dependent neural reorganisation, or neuroplasticity, is apparent in  
28  
29 response to repetitive and adaptive task engagement, disease, neglect and injury [11]. Cognitive  
30  
31 training is one of many interventions (including brain stimulation, neuropharmacology, physical  
32  
33 exercise and neurofeedback) that harnesses experience-dependent neuroplasticity with the aim of  
34  
35 achieving durable behavioural and functional change [11]. Cognitive training generally consists of  
36  
37 a program of exercises targeting specific cognitive skills, such as executive functioning, with the  
38  
39 aim of achieving adaptive neural changes which underpin improvements in cognition and/or  
40  
41 behaviour [12]. Cognitive training therapies, targeting a variety of cognitive processes, have  
42  
43 demonstrated success in a range of clinical populations, including preliminary evidence of  
44  
45 improvement in symptoms and cognition in those with affective, anxiety and substance use  
46  
47 disorders [12]. The usefulness of cognitive training for schizophrenia has been studied extensively,  
48  
49 with the research suggesting that such interventions can lead to enduring benefits for cognition and  
50  
51 contribute to gains in overall functioning in individuals with both early [13, 14] and established  
52  
53 [15, 16] symptoms.  
54  
55  
56  
57  
58  
59  
60



1  
2  
3  
4  
5 Evidence therefore suggests that cognitive training may be a useful intervention strategy for those  
6  
7 already showing symptoms of psychopathology, whether delivered during the early stages of  
8  
9 mental illness or later in the course of disease progression. However, the effectiveness of cognitive  
10  
11 training as a preventative strategy has not been thoroughly investigated. This is despite the  
12  
13 evidence suggesting that cognitive impairments [4], and associated loss of day-to-day functioning  
14  
15 [17, 18], frequently precede the onset of mental illness and may represent a non-specific prodromal  
16  
17 phase for a broad range of mental illnesses. As such, for individuals identified as at high risk for  
18  
19 developing a mental illness, cognitive training may therefore delay and, in some cases, prevent the  
20  
21 onset of a clinical disorder. Given the evidence to suggest that deficits in executive functioning are  
22  
23 associated with psychopathology across a range of mental illnesses [8, 9], this may be particularly  
24  
25 the case for cognitive training using exercises focusing on this domain.  
26  
27  
28  
29  
30  
31

32 A small pilot study has demonstrated the feasibility of using cognitive training as a targeted  
33  
34 prevention strategy during the critical adolescent period [19]. In this study, 15 adolescents (mean  
35  
36 age ~13 years) experiencing social, emotional and behavioural difficulties, but without a clinical  
37  
38 diagnosis, were randomised to a cognitive training intervention group (n=7) or a passive control  
39  
40 group (n=8). The training group completed a 30-40 minute battery of visuospatial and verbal  
41  
42 working memory tasks, five days a week, for five weeks. Compared with the passive control group,  
43  
44 those in the intervention group showed significantly better post-training scores on measures of IQ,  
45  
46 inhibition, test anxiety, and teacher-reported behaviour, attention and emotional symptoms. These  
47  
48 findings provide encouraging support for the notion that cognitive training delivered to at risk  
49  
50 adolescents may potentially prevent the onset of more serious social, emotional and behavioural  
51  
52 problems.  
53  
54  
55  
56  
57  
58  
59  
60

1  
2  
3 Another study piloted a preventative cognitive training program; this time for those at clinical high  
4 risk for psychosis [20]. While there were encouraging results, particularly in respect to  
5  
6 improvements in processing speed and prodromal symptoms, there was no comparison group used.  
7  
8 However, the findings provide further evidence of the feasibility of an intensive cognitive training  
9  
10 program for adolescents at risk for the development of mental illness. On the other hand, in another  
11  
12 pilot study targeting individuals at clinical high risk for psychosis, there were no significant  
13  
14 differences in cognition between the intervention and control groups immediately post-training  
15  
16 [21]. Furthermore, high attrition rates led the authors to suggest that more engaging interventions  
17  
18 should be trialled, especially for younger age groups.  
19  
20  
21  
22  
23  
24

25 Despite these promising findings in terms of both the treatment and prevention of mental illness,  
26  
27 several limitations of the cognitive training literature have been noted [22]. The ultimate goal of  
28  
29 cognitive training is to demonstrate that improvements in performing a particular task transfer to  
30  
31 improvements in an underlying cognitive ability more generally (near transfer; i.e., training on a  
32  
33 specific executive functioning task leads to improvements in overall executive functioning ability).  
34  
35 This improvement in cognition generally would then be the basis for any improvements in  
36  
37 behaviour (far transfer; i.e., improvements in overall executive functioning ability lead to decreases  
38  
39 in psychopathology). However, the ways in which near transfer have been investigated in many  
40  
41 previous studies has been flawed. Often only a single untrained task is used to measure near  
42  
43 transfer to the underlying cognitive ability [22]. The capacity for a single task to accurately reflect  
44  
45 multifaceted and complex cognitive abilities is questionable. Multiple tasks which measure  
46  
47 different dimensions of the underlying cognitive ability are therefore required. Many previous  
48  
49 studies have also used no control group or a “no contact” control group, which means that it is  
50  
51 often not possible to rule out placebo effects [22]. Finally, the assessment of training effects rarely  
52  
53  
54  
55  
56  
57  
58  
59  
60

1  
2  
3 extends beyond immediately post-training [22], meaning that the durability of any training effects  
4  
5 has not been established.  
6  
7

8  
9  
10 The primary objective of the *Brain Games* study is to therefore investigate whether cognitive  
11 training delivered online within a “smart gaming” platform is a viable targeted prevention strategy  
12 by examining its ability to reduce psychopathology in young people at high risk for developing a  
13 mental illness. In order to identify those at risk for developing a mental illness, this study will target  
14 personality risk factors, including hopelessness, anxiety sensitivity, impulsivity, and sensation  
15 seeking, which have been shown to reliably predict substance misuse, anxiety, emotional and  
16 behavioural disorders in young people [23, 24]. It is hypothesised that the intervention cognitive  
17 training program (focusing on executive functioning) will be more effective than the active control  
18 cognitive training program (focusing on cognitive abilities other than executive functioning) in  
19 reducing psychopathology. Secondary aims include assessing the comparative effects of the  
20 intervention and control training programs on executive functioning ability, day-to-day functioning  
21 and alcohol consumption.  
22  
23  
24  
25  
26  
27  
28  
29  
30  
31  
32  
33  
34  
35  
36  
37

## 38 **Methods and analysis**

### 39 **Study design**

40  
41 This study will consist of a parallel group randomised controlled trial with a 12-month follow-up  
42 period. The conduct and reporting of the trial will be in accordance with the CONSORT statement  
43 for non-pharmacological interventions. Participants will be randomly allocated to one of two  
44 cognitive training conditions: (1) the intervention group (cognitive training specifically focused on  
45 executive functioning), or (2) the control group (cognitive training focusing on other cognitive  
46 abilities). The allocation ratio will be 1:1. Superiority of the executive functioning training program  
47 compared with the control training program will be assessed at baseline, post-training, and at 3-, 6-  
48  
49  
50  
51  
52  
53  
54  
55  
56  
57  
58  
59  
60

1  
2  
3 and 12-months follow-up. All assessments will be conducted online. The primary outcome of the  
4  
5 study will be general psychopathology as measured by the Strengths and Difficulties Questionnaire  
6  
7 (SDQ). Secondary outcomes will include executive functioning ability as measured by online  
8  
9 neuropsychiatric tasks, as well as day-to-day functioning and alcohol consumption as measured by  
10  
11 standardised measures listed below. See Figure 1 for enrolment, assigned intervention, intervention  
12  
13 and follow-up scheme.  
14

### 15 16 17 18 *Sample size calculations* 19

20  
21 The primary outcome measure will be scores on the self-report version of the Strengths and  
22  
23 Difficulties Questionnaire (SDQ), a measure of psychopathology in young people with excellent  
24  
25 psychometric properties [25] and test-retest reliability [26]. One previous pilot study has  
26  
27 investigated the effect of cognitive training on psychopathology in at-risk young people using the  
28  
29 SDQ [19]. According to this study, there was a between-group effect size of .36 for the SDQ. A  
30  
31 similar effect size difference on the SDQ would therefore be expected in the current study. A total  
32  
33 sample size of  $n = 140$  ( $n=70$  per group) is powered to have an 80% chance of detecting .36 effect  
34  
35 size differences at  $p < 0.5$ . We will therefore aim to recruit  $n=220$  ( $n=110$  per group) in order to  
36  
37 account for potential attrition.  
38  
39  
40  
41  
42

### 43 **Procedure**

#### 44 45 *Participants and recruitment* 46

47  
48 Participants will be aged 16-24 years and at risk for a range of mental disorders. Participants will  
49  
50 be included if they meet the following criteria: 1) at high risk for development of a mental illness  
51  
52 based on elevated levels of personality risk factors, including hopelessness, anxiety  
53  
54 sensitivity, impulsivity, and sensation seeking [as measured by the Substance Use Risk Profile  
55  
56 Scale (SURPS), described below] ; 2) ability to access the internet via a computer; 4) residing  
57  
58  
59  
60

1  
2  
3 within Australia; and 3) willingness to provide contact details. Exclusion criteria will be: 1)  
4 insufficient English comprehension; 2) a lifetime mental illness diagnosis; 3) current involvement  
5 in psychotherapy or taking medication for mental illness, pain, thyroid problems and/or epilepsy; 4)  
6 intellectual disability; 5) a history of neurological or cardiovascular disorders, brain surgery,  
7 electroconvulsive or radiation treatment, thyroid disorders, brain haemorrhage or tumour, stroke,  
8 diabetes, seizures or epilepsy; and 6) significant previous experience with online cognitive training  
9 programs.  
10  
11  
12  
13  
14  
15  
16  
17  
18  
19

20  
21 Community participants will be recruited through advertisements on social media platforms.  
22  
23 Recruitment through social media has been shown to be effective and cost efficient, with obtained  
24 samples of similar representativeness as those recruited via traditional methods [27] and will  
25 indicate their interest by clicking on the advertisement, after which they will be taken to the study  
26 website (www.braingames.org) that provides more detailed information about the study. After  
27 reading this information, the participant continues onto eligibility screening which will be  
28 conducted through the study website. Online eligibility screening will assess for all exclusion and  
29 inclusion criteria, except for a prior diagnosis of a mental illness. If eligible, participants will then  
30 be contacted by a trained researcher from the University of New South Wales, Australia, who will  
31 conduct a telephone-administered diagnostic interview to assess for a lifetime diagnosis of major  
32 depressive disorder, panic disorder, social anxiety disorder, generalised anxiety disorder, obsessive-  
33 compulsive disorder, posttraumatic stress disorder, alcohol dependence, other substance  
34 dependence, attention deficit hyperactivity disorder, conduct disorder and oppositional defiant  
35 disorder. Those who do not meet eligibility criteria after completion of the online or telephone-  
36 administered interviews will be informed of their ineligibility, and given referrals and/or  
37 information for crisis care where necessary. After telephone screening, eligible participants will be  
38 sent a link to complete the baseline assessment through the study website. Following baseline  
39  
40  
41  
42  
43  
44  
45  
46  
47  
48  
49  
50  
51  
52  
53  
54  
55  
56  
57  
58  
59  
60

1  
2  
3 assessment, participants will be given a unique code which will be randomly associated with one of  
4  
5 the two cognitive training conditions. Randomisation of these codes to the intervention and control  
6  
7 conditions will be conducted by an offsite technician who will allocate all unique codes to one of  
8  
9 the two conditions through the website random.org. Both the research team and participant will be  
10  
11 blind to this allocation. Participants will be free to withdraw from the study at any time, and will  
12  
13 not be prohibited from seeking concomitant care. Those participants who do withdraw will not  
14  
15 complete any further assessments. Enrolment into the study will be rolling, with each participant  
16  
17 starting their training the day after they have completed their baseline tasks.  
18  
19  
20

21  
22  
23 Participants will provide online consent for the internet-administered eligibility screening, as well  
24  
25 as formal written consent for the diagnostic interview and participation in the study itself. Online  
26  
27 and written consent forms have been included in Supplementary Files 1 and 2.  
28  
29  
30

### 31 32 *Intervention and control conditions*

33  
34 Both the intervention and control conditions will complete cognitive training consisting of  
35  
36 computerised tasks provided by *Lumosity* (<http://www.lumosity.com/>), and administered on a  
37  
38 remote internet-connected computer owned by the participant. All tasks within the commercially  
39  
40 available *Lumosity* package have “game-like” features making them visually engaging and  
41  
42 motivating. The tasks are designed to be dynamic and adaptive, such that the difficulty increases as  
43  
44 the participants’ performance improves. Training for both conditions will consist of an intensive  
45  
46 program of ten games per day (~30-40 minutes), five days per week, over five weeks. Training  
47  
48 compliance will be assessed during the active training phase, with reminder emails sent after one  
49  
50 missed session, and a further email sent after two missed sessions. Non-compliance to the training  
51  
52 protocol will be recorded if a participant: 1) misses four or more consecutive days of training; 2)  
53  
54 completes less than 20 full sessions of training; or 3) is unable to complete their program within 6  
55  
56  
57  
58  
59  
60

1  
2  
3 weeks (42 days). However, post-training and follow-up data will be collected for non-compliant  
4  
5 participants unless they formally withdraw from the study or are unable to be contacted. Given the  
6  
7 non-invasive nature of the intervention, adverse events are not anticipated. Spontaneous reporting  
8  
9 of adverse events will be discussed with the study clinicians and responded to according to their  
10  
11 recommendations. Training games for the intervention group will specifically focus on executive  
12  
13 functioning, and will be based on classic paradigms used in cognitive neuroscience and executive  
14  
15 functioning batteries. The control group will be administered cognitive training games that do not  
16  
17 target executive functioning, and instead focus on field of view, verbal fluency and quantitative  
18  
19 reasoning. The features of the control tasks will be matched to those of the intervention tasks in all  
20  
21 other respects. Tasks included in both the intervention and control training programs were selected  
22  
23 on the basis of consensus ratings with experienced clinicians.  
24  
25  
26  
27  
28

### 29 *Assessment Occasions*

30  
31 Both those assigned to the intervention and to the control group will be assessed at baseline, post-  
32  
33 trial, and at 3-, 6- and 12- month follow-up intervals. All assessments at each occasion will be fully  
34  
35 automated and conducted online using the participants' own computer.  
36  
37  
38  
39

### 40 **Measures**

#### 41 *Eligibility screening*

42  
43 Demographic data on gender, age, country of birth and rurality will be collected online before  
44  
45 eligibility is assessed. Eligibility screening will consist of a 23-item self-report online questionnaire  
46  
47 assessing personality risk factors [the Substance Use Risk Profile Scale (SURPS)] [28], with four  
48  
49 subscales representing hopelessness, anxiety sensitivity, impulsivity, and sensation seeking.  
50  
51 Participants scoring one or more standard deviations above the mean on any of the four SURPS  
52  
53 subscales will be deemed eligible for the current study. Threshold means and standard deviations  
54  
55  
56  
57  
58  
59  
60

1  
2  
3 will be based on a previous validity study of the SURPS in Australian adolescents [23]. Scores on  
4  
5 these subscales have been shown to reliably predict future substance use, as well as anxiety,  
6  
7 emotional and behavioural disorders. The SURPS has been shown to have good concurrent and  
8  
9 predictive validity, and the separate subscales display good specificity [29].  
10

11  
12  
13  
14 For those aged less than 18 years, the telephone-administered diagnostic interview for lifetime  
15  
16 mental illnesses will be conducted using a lifetime version of the Mini International  
17  
18 Neuropsychiatric Interview for Children and Adolescents (MINI-KID). The MINI-KID is a  
19  
20 structured, lay-administered self-report diagnostic interview for children of ages 6 to 17 years old  
21  
22 which is designed to assess DSM-IV psychiatric disorders. The MINI-KID has been shown to have  
23  
24 excellent reliability and excellent concordance with clinician diagnoses [30]. For those aged 18  
25  
26 years and older, a lifetime version of the Mini International Neuropsychiatric Interview (MINI) will  
27  
28 be administered. The MINI is also a structured, lay-administered self-report diagnostic interview  
29  
30 designed to assess DSM-IV psychiatric disorders with excellent reliability and good concordance  
31  
32 with a clinician-administered diagnostic interview [31, 32].  
33  
34  
35  
36  
37

### 38 *Baseline assessment*

39  
40 Psychopathology will be assessed using the SDQ, a 25-item self-report behavioural screening  
41  
42 inventory for children and adolescents which measures positive and negative attributes of  
43  
44 participants [33]. The SDQ has been used extensively and has strong psychometric properties [25].  
45  
46 The SDQ is also brief and multidimensional, providing information across a wide range of  
47  
48 psychopathology as required for the current study. An online version of this questionnaire will be  
49  
50 developed for the current study in consultation with the original SDQ developers. Recently, a  
51  
52 young adult version of the SDQ has also been developed, with minor changes to the wording and  
53  
54 scoring of the adolescent instrument. According to the developers of this instrument, it has been  
55  
56  
57  
58  
59  
60



1  
2  
3 used extensively in practice but validation studies of this instrument have only been published in  
4  
5 special populations at present [34, 35]. The young adult version will also be used to assess  
6  
7 psychopathology in those aged 18 years and over in the current study to allow continuity of  
8  
9 measurement across the full sample.  
10

11  
12  
13  
14 An online version of the WHODAS 2.0 12-item version (World Health Organisation, 2010) will be  
15  
16 used to assess overall functioning and disability experienced as a result of health conditions  
17  
18 (including mental illness or substance use) over the past 30 days. The WHODAS has been used  
19  
20 extensively as a measure of functioning and disability and has been validated for both online use  
21  
22 and in individuals aged 16 years and over in the Australian population [36, 37].  
23  
24  
25

26  
27 Participants' recent and historical alcohol consumption will be assessed online by 14 questions  
28  
29 adapted from the School Health and Alcohol Harm Reduction Project (SHAHRP) 'Patterns of  
30  
31 Alcohol' index [38]. These questions ask responders about the frequency and quantity of different  
32  
33 drinking behaviours, and age of first participation in these behaviours.  
34  
35  
36

37  
38 Online executive functioning assessment will be included as a measure of executive functioning  
39  
40 improvement on untrained tasks. This assessment will consist of the N-Back Task [39] to evaluate  
41  
42 working memory, the Trail Making Test [40] to assess task shifting, and the Stroop Task [41] to  
43  
44 evaluate inhibitory control. These tasks will be administered using Inquisit software  
45  
46 (<http://www.millisecond.com/download/library/>).  
47  
48  
49

50  
51  
52 Participants will also be asked to answer an online questionnaire about their satisfaction with the  
53  
54 training program.  
55  
56  
57  
58  
59  
60

### *Follow-up assessments*

Each of the assessments at post-training, 3-, 6- and 12-months follow-up will consist of the online versions of the SDQ, SURPS, WHODAS and alcohol consumption questionnaires, as well as the online executive functioning assessment. At the 12-month assessment, data will also be collected on service use and any use of the *Lumosity* program over the follow-up period.

All data collected in computerised format will be stored on password protected computers in databases using pre-defined codes. Rigorous data encryption will restrict external access to participant online content. The website uses industry leading encryption for all transmissions. The SSL certificate includes domain authentication and 256-bit SSL encryption. HTTPS (SSL) will be used for complete website including all sub domains. A data access layer (DAL) is used for all database functionality requirements within the site with the majority of database connections set up with stored procedures.

### **Statistical Analysis**

Data will be analysed on an intention-to-treat basis. All analyses will be undertaken using mixed-model repeated measures (MMRM) ANOVA, with measurement occasion as a within-groups factor, and experimental group as a between-groups factor. These models are robust to missing data under missing-at-random assumptions. Relationships between observations at different occasions will be modelled with an unstructured covariance matrix. For each experimental group, planned contrasts will be used to compare changes from baseline to post-test, 3-, 6- and 12- month follow-up intervals. Given the high rates of attrition expected, secondary analyses will also be conducted for all outcome variables on a per-protocol basis.

### **Ethics and dissemination**

1  
2  
3 Ethical approval for the *Brain Games* study has been granted from the UNSW Human Research  
4  
5 Ethics Committee (HC15094). Any protocol amendments will first be discussed by the team of  
6  
7 investigators after which an ethics modification will be submitted.  
8  
9

10  
11 Results of the trial immediately post-treatment and at 12-months follow-up will be submitted for  
12  
13 publication in peer-reviewed journals. After all study data has been collected, all participants will  
14  
15 receive a document outlining the main results of the study. All lead investigators will be listed as  
16  
17 authors on all publications unless they opt out of authorship.  
18  
19

20  
21 The de-identified dataset generated and analysed during the current study are available from the  
22  
23 corresponding author on reasonable request.  
24  
25  
26  
27  
28

## 29 **Discussion**

30  
31 The present study protocol presents the design of a randomised controlled trial that assesses  
32  
33 whether online executive functioning training is a viable strategy for the targeted prevention of  
34  
35 mental illness and substance use in high-risk youth. The primary aim of the *Brain Games* trial is to  
36  
37 investigate whether an executive functioning training program is more effective at preventing  
38  
39 symptoms of psychopathology than cognitive training that has limited executive functioning  
40  
41 training potential. By investigating a novel prevention strategy targeting executive functioning, the  
42  
43 *Brain Games* study will be the first full-scale trial conducted internationally that investigates the  
44  
45 utility of cognitive training in the prevention of mental illness in high-risk adolescents. This study  
46  
47 targets underlying executive functioning deficits that have been identified across the boundaries of  
48  
49 traditional categorical psychiatric diagnoses.  
50  
51  
52  
53  
54  
55  
56  
57  
58  
59  
60

1  
2  
3 Novel universal prevention programs that cross diagnostic boundaries are currently being trialled in  
4  
5 Australian schools [42]. For high-risk adolescents, however, universal prevention programs have  
6  
7 been shown to have limited benefits [43]. In terms of practical applications, it is envisaged that  
8  
9 transdiagnostic prevention strategies that target high-risk adolescents, such as the present one,  
10  
11 would eventually complement and augment a transdiagnostic approach to school-based universal  
12  
13 prevention. This stepped-care sequential prevention model has the potential to maximize outcomes  
14  
15 for both high- and low-risk students across a range of mental illnesses and reduce the considerable  
16  
17 burden of disease associated with these illnesses in adolescence.  
18  
19

## 20 21 22 23 **Declarations**

### 24 *Authors' contributions*

25  
26  
27 LM is the Chief Investigator of the *Brain Games* study. AH and NG provide clinical and  
28  
29 neuropsychological expertise and MT provides expertise in prevention research. LM, AH, NG and  
30  
31 MT were all involved in the study design. LM and RV are involved in data collection. All authors  
32  
33 will be involved in the reporting of the study results. LM and RV wrote the first draft of the  
34  
35 manuscript. All authors provided feedback on subsequent drafts and approved the final manuscript.  
36  
37

### 38 39 40 *Funding*

41  
42 The *Brain Games* study is funded by an Australian Rotary Health Postdoctoral Fellowship.  
43  
44 Australian Rotary Health had no role in the design of the study or the collection, analysis, and  
45  
46 interpretation of data and in writing the manuscript.  
47  
48

### 49 *Competing interests*

50  
51 The authors declare that they have no competing interests.  
52  
53

54 *Figure 1* Flowchart of the randomised control trial: enrolment, assigned intervention, intervention  
55  
56 and follow-up scheme  
57  
58  
59  
60

## References

1. Murray, C.J., et al., *Disability-adjusted life years (DALYs) for 291 diseases and injuries in 21 regions, 1990–2010: a systematic analysis for the Global Burden of Disease Study 2010*. The Lancet, 2013. **380**(9859): p. 2197-2223.
2. Merikangas, K.R., et al., *Lifetime prevalence of mental disorders in US adolescents: results from the National Comorbidity Survey Replication-Adolescent Supplement (NCS-A)*. Journal of the American Academy of Child & Adolescent Psychiatry, 2010. **49**(10): p. 980-989.
3. Kessler, R., et al., *Lifetime co-morbidity of DSM-IV disorders in the US National Comorbidity Survey Replication Adolescent Supplement (NCS-A)*. Psychological Medicine, 2012. **42**(09): p. 1997-2010.
4. Lewis, D.A., *Cortical circuit dysfunction and cognitive deficits in schizophrenia—implications for preemptive interventions*. European Journal of Neuroscience, 2012. **35**(12): p. 1871-1878.
5. Giedd, J.N., M. Keshavan, and T. Paus, *Why do many psychiatric disorders emerge during adolescence?* Nature Reviews Neuroscience, 2008. **9**(12): p. 947-957.
6. Crews, F., J. He, and C. Hodge, *Adolescent cortical development: a critical period of vulnerability for addiction*. Pharmacology, Biochemistry & Behavior, 2007. **86**(2): p. 189-99.
7. Vinogradov, S., M. Fisher, and E. de Villers-Sidani, *Cognitive training for impaired neural systems in neuropsychiatric illness*. Neuropsychopharmacology, 2011. **37**(1): p. 43-76.
8. Goodkind, M., et al., *Identification of a common neurobiological substrate for mental illness*. JAMA Psychiatry, 2015. **72**(4): p. 305-315.
9. Shanmugan, S., et al., *Common and dissociable mechanisms of executive system dysfunction across psychiatric disorders in youth*. American journal of psychiatry, 2016. **173**(5): p. 517-526.
10. Valkanova, V., R.E. Rodriguez, and K.P. Ebmeier, *Mind over matter-what do we know about neuroplasticity in adults?* International Psychogeriatrics, 2014. **26**(6): p. 891.
11. Cramer, S.C., et al., *Harnessing neuroplasticity for clinical applications*. Brain, 2011. **134**(6): p. 1591-1609.
12. Keshavan, M.S., et al., *Cognitive training in mental disorders: update and future directions*. American Journal of Psychiatry, 2014. **171**(5): p. 510-522.
13. Revell, E.R., et al., *A systematic review and meta-analysis of cognitive remediation in early schizophrenia*. Schizophrenia research, 2015. **168**(1): p. 213-222.
14. Lee, R., et al., *Cognitive remediation improves memory and psychosocial functioning in first-episode psychiatric out-patients*. Psychological medicine, 2013. **43**(06): p. 1161-1173.
15. Wykes, T., et al., *A meta-analysis of cognitive remediation for schizophrenia: methodology and effect sizes*. American Journal of Psychiatry, 2011. **168**(5): p. 472-485.
16. Medalia, A. and A.M. Saperstein, *Does cognitive remediation for schizophrenia improve functional outcomes?* Current Opinion in Psychiatry, 2013. **26**(2): p. 151-157.
17. Hetrick, S., et al., *Early identification and intervention in depressive disorders: towards a clinical staging model*. Psychotherapy and psychosomatics, 2008. **77**(5): p. 263-270.
18. McGorry, P.D., *Staging in neuropsychiatry: a heuristic model for understanding, prevention and treatment*. Neurotoxicity research, 2010. **18**(3-4): p. 244-255.
19. Roughan, L. and J.A. Hadwin, *The impact of working memory training in young people with social, emotional and behavioural difficulties*. Learning and Individual Differences, 2011. **21**(6): p. 759-764.
20. Hooker, C.I., et al., *A pilot study of cognitive training in clinical high risk for psychosis: initial evidence of cognitive benefit*. Schizophrenia research, 2014. **157**: p. 314.
21. Piskulic, D., et al., *Pilot study of cognitive remediation therapy on cognition in young people at clinical high risk of psychosis*. Psychiatry research, 2015. **225**(1): p. 93-98.
22. Shipstead, Z., T.S. Redick, and R.W. Engle, *Is working memory training effective?* Psychological bulletin, 2012. **138**(4): p. 628.
23. Newton, N.C., et al., *The validity of the Substance Use Risk Profile Scale (SURPS) among Australian adolescents*. Addictive behaviors, 2016. **53**: p. 23-30.
24. Castellanos, N. and P. Conrod, *Brief interventions targeting personality risk factors for adolescent substance misuse reduce depression, panic and risk-taking behaviours*. Journal of Mental Health, 2006. **15**(6): p. 645-658.
25. Goodman, R., *Psychometric properties of the strengths and difficulties questionnaire*. Journal of the American Academy of Child & Adolescent Psychiatry, 2001. **40**(11): p. 1337-1345.
26. Hawes, D.J. and M.R. Dadds, *Australian data and psychometric properties of the Strengths and Difficulties Questionnaire*. Australian and New Zealand Journal of Psychiatry, 2004. **38**(8): p. 644-651.
27. Thornton, L., et al., *Recruiting for health, medical or psychosocial research using Facebook: systematic review*. Internet Interventions, 2016. **4**: p. 72-81.

- 1  
2  
3  
4  
5  
6  
7  
8  
9  
10  
11  
12  
13  
14  
15  
16  
17  
18  
19  
20  
21  
22  
23  
24  
25  
26  
27  
28  
29  
30  
31  
32  
33  
34  
35  
36  
37  
38  
39  
40  
41  
42  
43  
44  
45  
46  
47  
48  
49  
50  
51  
52  
53  
54  
55  
56  
57  
58  
59  
60
28. Woicik, P.A., et al., *The substance use risk profile scale: A scale measuring traits linked to reinforcement-specific substance use profiles*. Addictive behaviors, 2009. **34**(12): p. 1042-1055.
  29. Castellanos-Ryan, N., et al., *Sensitivity and specificity of a brief personality screening instrument in predicting future substance use, emotional, and behavioral problems: 18-month predictive validity of the substance use risk profile scale*. Alcoholism: Clinical and Experimental Research, 2013. **37**(s1): p. E281-E290.
  30. Sheehan, D.V., et al., *Reliability and validity of the mini international neuropsychiatric interview for children and adolescents (MINI-KID)*. The Journal of clinical psychiatry, 2010. **71**(3): p. 313-326.
  31. Lecrubier, Y., et al., *The Mini International Neuropsychiatric Interview (MINI). A short diagnostic structured interview: reliability and validity according to the CIDI*. European psychiatry, 1997. **12**(5): p. 224-231.
  32. Sheehan, D., et al., *The validity of the Mini International Neuropsychiatric Interview (MINI) according to the SCID-P and its reliability*. European Psychiatry, 1997. **12**(5): p. 232-241.
  33. Goodman, R., H. Meltzer, and V. Bailey, *The Strengths and Difficulties Questionnaire: A pilot study on the validity of the self-report version*. European child & adolescent psychiatry, 1998. **7**(3): p. 125-130.
  34. Glenn, S., et al., *Using the strengths and difficulties questionnaire with adults with Down syndrome*. Research in developmental disabilities, 2013. **34**(10): p. 3343-3351.
  35. Findon, J., et al., *Screening for co-occurring conditions in adults with autism spectrum disorder using the strengths and difficulties questionnaire: A pilot study*. Autism Research, 2016. **9**(12): p. 1353-1363.
  36. Kimber, M., J. Rehm, and M.A. Ferro, *Measurement Invariance of the WHODAS 2.0 in a population-based sample of youth*. PloS one, 2015. **10**(11): p. e0142385.
  37. Andrews, G., et al., *Normative data for the 12 item WHO Disability Assessment Schedule 2.0*. PloS one, 2009. **4**(12): p. e8343.
  38. McBride, N., et al., *Harm minimization in school drug education: final results of the School Health and Alcohol Harm Reduction Project (SHAHRP)*. Addiction, 2004. **99**(3): p. 278-291.
  39. Jaeggi, S.M., et al., *The concurrent validity of the N-back task as a working memory measure*. Memory, 2010. **18**(4): p. 394-412.
  40. Reitan, R.M., *Validity of the Trail Making Test as an indicator of organic brain damage*. Perceptual and motor skills, 1958. **8**(3): p. 271-276.
  41. Stroop, J.R., *Studies of interference in serial verbal reactions*. Journal of experimental psychology, 1935. **18**(6): p. 643.
  42. Teesson, M., et al., *The CLIMATE schools combined study: a cluster randomised controlled trial of a universal Internet-based prevention program for youth substance misuse, depression and anxiety*. BMC psychiatry, 2014. **14**(1): p. 32.
  43. Faggiano, F., et al., *School-based prevention for illicit drugs use: A systematic review*. Preventive medicine, 2008. **46**(5): p. 385-396.

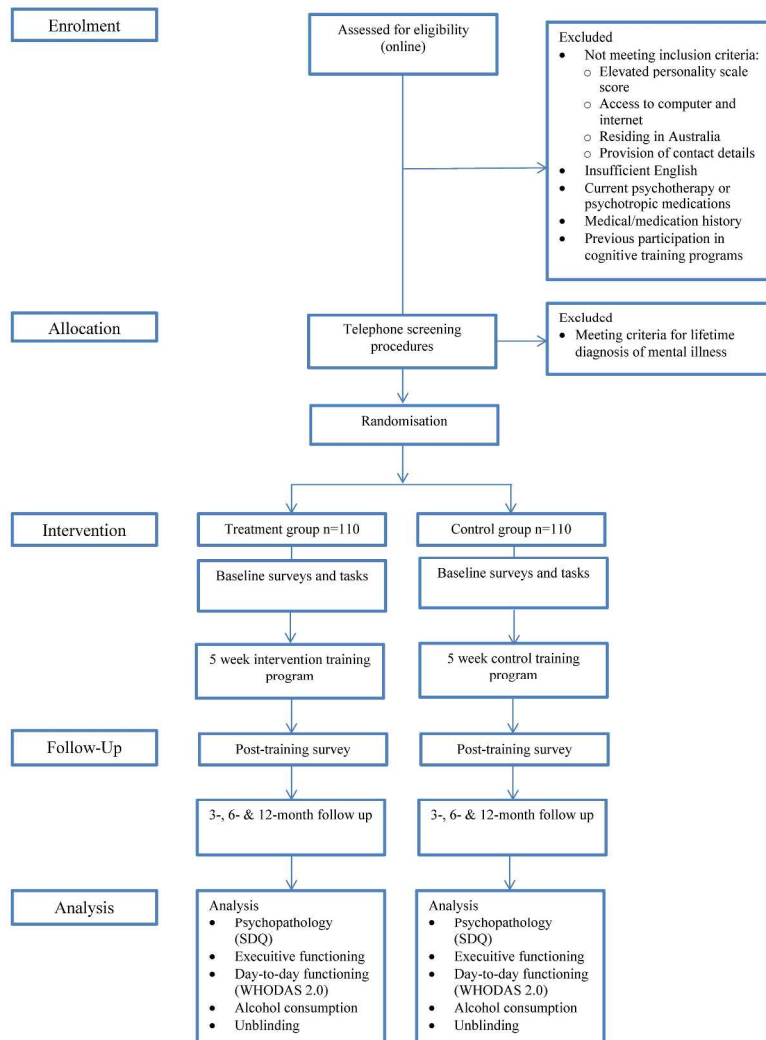

Figure 1 Flowchart of the randomised control trial: enrolment, assigned intervention, intervention and follow-up scheme

Figure 1 Flowchart of the randomised control trial: enrolment, assigned intervention, intervention and follow-up scheme

297x420mm (300 x 300 DPI)

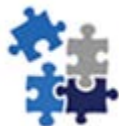

NHMRC CENTRE OF RESEARCH EXCELLENCE  
in MENTAL HEALTH and SUBSTANCE USE

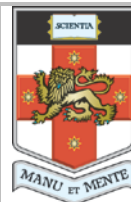

UNSW  
AUSTRALIA

## ONLINE PARTICIPANT INFORMATION STATEMENT

The Brain Games Study

Dr Louise Mewton

| The research study is being carried out by the following researchers: |                                                                                                                            |                                                                |
|-----------------------------------------------------------------------|----------------------------------------------------------------------------------------------------------------------------|----------------------------------------------------------------|
| Role                                                                  | Name                                                                                                                       | Organisation                                                   |
| Chief Investigator                                                    | Dr Louise Mewton                                                                                                           | University of New South Wales                                  |
| Co-Investigator/s                                                     | Dr Nicola Gates, Dr Antoinette Hodge & Professor Maree Teesson                                                             | Westmead Children's Hospital and University of New South Wales |
| Research Funder                                                       | This research is being funded by Australian Rotary Health and the Australian National Health and Medical Research Council. |                                                                |

### What is the research study about?

Thank you for your interest in the Brain Games study. Researchers at The University of New South Wales are seeking volunteer research participants to learn about whether brain training ("Brain Games") can reduce risky behaviours, anxiety and negative emotions which may lead to mental illness in the future.

### Would the research project be a good fit for me?

The study might be a good fit for you if:

- You report risky behaviours, or experience high anxiety or negative emotions
- You have ready access to an internet computer
- You are willing to provide the researchers with a current phone number and email address

The study will not be a good fit for you if:

- You meet criteria for an anxiety, mood or substance use disorder, or report certain medical conditions

### Do I have to take part in this research study?

This Participant Information Statement tells you about the research study. It explains the research tasks involved. Knowing what is involved will help you decide if you want to take part in the research. Please read this information carefully. Before deciding whether or not to take part, you might want to talk about it with a relative or friend. Participation in this research is voluntary. If you don't wish to take part, you don't have to. Your decision will not affect your relationship with The University of New South Wales.

### What does participation in this research require, and are there any risks involved?

Before you begin any activities we need to do ask some more questions to understand whether it is ok for you to take part. Once you complete this consent form, you will be asked to complete an online questionnaire about yourself, your personality and any medical conditions you might have. This questionnaire will take about five minutes to complete and will be used to determine whether or not you are able to take part in the study. If you are able, we will ask you for your email address and contact number and a researcher will contact you and ask further eligibility questions over the telephone. If you are not able, we will provide you with the details of relevant healthcare professionals should you feel the need to speak with someone after the online or telephone administered questionnaires.

If you are able to participate in the study, you will be randomly assigned to one of two different training groups. Both groups will be asked to complete an online Brain Games program. We will ask you to do the program for a maximum of one hour every weekday for a total of five weeks. In total, the program will take a maximum of 25 hours. We will also ask you to complete some questionnaires and tasks before and after the Brain Games



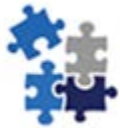

NHMRC CENTRE OF RESEARCH EXCELLENCE  
in MENTAL HEALTH and SUBSTANCE USE

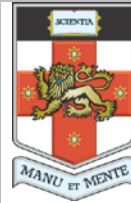

UNSW  
AUSTRALIA

## ONLINE PARTICIPANT INFORMATION STATEMENT

The Brain Games Study  
Dr Louise Mewton

program, and then 3 months, 6 months and 12 months after you have finished the Brain Games program. We expect that each set of questionnaires and tasks will take up to an hour to complete so we expect you will spend a total of 5 hours doing these over the course of a year.

### What will happen to information about me?

By clicking on the 'I agree' button you consent to the research team collecting and using information from the screening questionnaires you complete for the research study. If you are eligible for the study, we will keep your confidential data for 7 years. Any information obtained in connection with this research study that can identify you will remain confidential. If you are not eligible for the study, your data will be withdrawn.

### What if I want to withdraw from the research study?

Submitting your completed questionnaire is an indication of your consent to participate in the study. You can withdraw your responses if you change your mind about having them included in the study, up to the point that we have analysed and published the results. You can do this by submitting the online Withdrawal of Participation form or contact Dr Louise Mewton any time by phone (02 8936 1131) or email (louisem@unsw.edu.au).

### What should I do if I have further questions about my involvement in the research study?

The person you may need to contact will depend on the nature of your query. If you want any further information concerning this project or if you have any problems which may be related to your involvement in the project, you can contact the following member/s of the research team:

#### Research Team Contact

|                  |                     |
|------------------|---------------------|
| <b>Name</b>      | Dr Louise Mewton    |
| <b>Position</b>  | Research Officer    |
| <b>Telephone</b> | 02 8936 1131        |
| <b>Email</b>     | louisem@unsw.edu.au |

If at any stage during the project you become distressed or require additional support from someone not involved in the research please call:

#### Contact for feelings of distress

|                          |                     |
|--------------------------|---------------------|
| <b>Name/Organisation</b> | Kids Helpline       |
| <b>Telephone</b>         | 1800 551 800        |
| <b>Email</b>             | www.kidshelp.com.au |

If you have any complaints about any aspect of the project, the way it is being conducted, then you may contact:

#### Complaints Contact

|                            |                                                                      |
|----------------------------|----------------------------------------------------------------------|
| <b>Position</b>            | Human Research Ethics Coordinator                                    |
| <b>Telephone</b>           | + 61 2 9385 6222                                                     |
| <b>Email</b>               | <a href="mailto:humanethics@unsw.edu.au">humanethics@unsw.edu.au</a> |
| <b>HC Reference Number</b> | XXXX                                                                 |

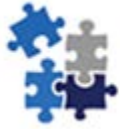

NHMRC CENTRE OF RESEARCH EXCELLENCE  
in MENTAL HEALTH and SUBSTANCE USE

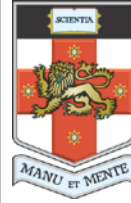

UNSW  
AUSTRALIA

## ONLINE PARTICIPANT INFORMATION STATEMENT

The Brain Games Study  
Dr Louise Newton

### Consent Form – Participant providing own consent

#### Declaration by the participant

- I have read the Participant Information Sheet;
- I understand the purposes, study tasks and risks of the research described in the project;
- I have had an opportunity to ask questions and I am satisfied with the answers I have received;
- I freely agree to participate in this research study as described and understand that I am free to withdraw at any time during the project and withdrawal will not affect my relationship with any of the named organisations and/or research team members;
- I understand that I can download a copy of this consent form from [www.braingames.org.au](http://www.braingames.org.au).

#### Participant Details

|                                           |  |
|-------------------------------------------|--|
| Name of Participant (please type)         |  |
| Participant email address (if applicable) |  |
| Date                                      |  |

I agree, start questionnaire

Review only

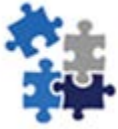

NHMRC CENTRE OF RESEARCH EXCELLENCE  
in MENTAL HEALTH and SUBSTANCE USE

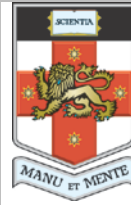

UNSW  
AUSTRALIA

**ONLINE PARTICIPANT INFORMATION STATEMENT**

The Brain Games Study  
Dr Louise Newton

**Form for Withdrawal of Participation**

I wish to **WITHDRAW** my consent to participate in the research proposal described above and understand that such withdrawal **WILL NOT** affect my relationship with The University of New South Wales.

**Participant Name**

|                                      |  |
|--------------------------------------|--|
| Name of Participant<br>(please type) |  |
| Date                                 |  |

**Submit withdrawal of consent**

Peer review only

1  
2  
3  
4  
5  
6  
7  
8  
9  
10  
11  
12  
13  
14  
15  
16  
17  
18  
19  
20  
21  
22  
23  
24  
25  
26  
27  
28  
29  
30  
31  
32  
33  
34  
35  
36  
37  
38  
39  
40  
41  
42  
43  
44  
45  
46  
47  
48  
49  
50  
51  
52  
53  
54  
55  
56  
57  
58  
59  
60

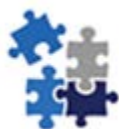

NHMRC CENTRE OF RESEARCH EXCELLENCE  
in MENTAL HEALTH and SUBSTANCE USE

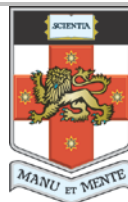

UNSW  
AUSTRALIA

## PARTICIPANT INFORMATION STATEMENT AND CONSENT FORM

The Brain Games Study  
Dr Louise Mewton

| The research study is being carried out by the following researchers: |                                                                                                                            |                                                                |
|-----------------------------------------------------------------------|----------------------------------------------------------------------------------------------------------------------------|----------------------------------------------------------------|
| Role                                                                  | Name                                                                                                                       | Organisation                                                   |
| Chief Investigator                                                    | Dr Louise Mewton                                                                                                           | University of New South Wales                                  |
| Co-Investigator/s                                                     | Dr Nicola Gates, Dr Antoinette Hodge & Professor Maree Teesson                                                             | Westmead Children's Hospital and University of New South Wales |
| Research Funder                                                       | This research is being funded by Australian Rotary Health and the Australian National Health and Medical Research Council. |                                                                |

### What is the research study about?

You are invited to take part in this online research study. You have been invited because of certain behaviours or emotions you reported in response to our questionnaire.

To participate in this research study you need to meet the following inclusion criteria:

1) the experience of risky behaviours, high anxiety or negative emotions; 2) be able to access the internet readily via a desktop or laptop computer (either in your home, or willingness to use public library/other suitable venue with internet access); 3) be willing to provide current email address and phone number. You will not be able to take part in this study if you meet criteria for an anxiety, mood or substance use disorder, if you take certain medications, or have certain medical conditions.

The research study is aiming to determine whether brain training in the form of online games ("Brain Games") can reduce risky behaviours, anxiety and negative emotions which may lead to mental illness in the future.

### Do I have to take part in this research study?

This Participant Information Statement tells you about the research study. It explains the research tasks involved. Knowing what is involved will help you decide if you want to take part in the research.

Please read this information carefully. If there is anything that you don't understand or want to know more about please feel free to contact the research team. Before deciding whether or not to take part, you might want to talk about it with a relative or friend.

If you decide you want to take part in the research study, you will be asked to:

- Type your name into the boxes at the bottom of this consent form ;
- Keep a copy of this Participant Information Statement;

### What does participation in this research require, and are there any risks involved?

Before you begin any activities we need to do ask some more questions to understand whether it is ok for you to take part. In order to do this we will contact you by telephone and ask you to answer questions about your feelings and behaviours, including substance use. It is expected that these questions will take about half an hour for you to complete. If you are not suitable for the study, we will let you know over the telephone, provide you with information for services should you need them, and withdraw all your data from the study.

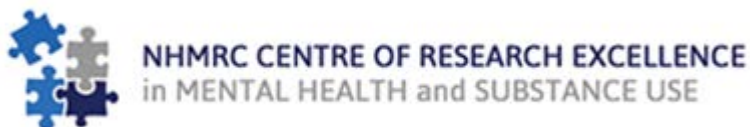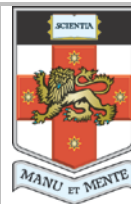

**UNSW**  
A U S T R A L I A

## PARTICIPANT INFORMATION STATEMENT AND CONSENT FORM

The Brain Games Study  
Dr Louise Newton

If you are suitable for the study, you will be randomly assigned to one of two different training groups. Both groups will be asked to complete an online Brain Games program. We will ask you to do the program for a maximum of one hour every weekday for a total of five weeks. In total, the program will take a maximum of 25 hours. The Brain Games program is like a computer game, and we expect that you will find the Brain Games sessions fun as well as challenging. Before and after you have completed your online Brain Games sessions we will ask you to complete online and telephone-administered questionnaires about your feelings and behaviours, including substance use, as well as some tasks that will tell us about your different abilities. We will also ask you to complete these same questionnaires and tasks 3 months, 6 months and 12 months after you have finished the Brain Games program. We expect that each set of questionnaires and tasks will take up to an hour to complete so we expect you will spend a total of 5 hours doing these over the course of a year. At the end of the study we want to compare the two different Brain Games programs to see whether one is better than the other in terms improving any negative feelings or risky behaviours you might be experiencing. At the moment, we are not sure if one program is better than the other, or whether you will benefit from participating in this study.

We do not expect there to be any risks associated with completing the Brain Games program. It is possible you might experience some distress when answering the questionnaires that ask about sensitive topics. If you do experience distress you will be encouraged to contact the research team and you will be given contact information for services equipped to deal with any distress you might be experiencing.

### **Will I be paid to participate in this project?**

You will be reimbursed \$50 for taking the time to complete the Brain Games program. After you have completed all the questionnaires you will also go into a draw to win an iPad.

### **What are the possible benefits to participation?**

We hope to use information we get from this research study to benefit others who might also behave in risky ways or experience anxiety or negative emotions.

### **What will happen to information about me?**

By typing your name into this form, you consent to the research team collecting and using information from the questionnaire you complete for the research study. We will keep your confidential data for 7 years. Any information obtained in connection with this research study that can identify you will remain confidential. This project will use an external site to create, collect and analyse data collected in a questionnaire format. The site we are using is [www.braingames.org.au](http://www.braingames.org.au). If you agree to participate in this study, the responses you provide to the questionnaire will be stored on a host server that is used by Indigo hosting. Once we have completed our data collection and analysis, we will import the data we collect to the UNSW server. The data on the Indigo hosting server will then be deleted.

It is anticipated that the results of this research study will be published and/or presented in a variety of forums. In any publication and/or presentation, information will be provided in such a way that your research findings may be published, but you will not be individually identifiable in these publications.



NHMRC CENTRE OF RESEARCH EXCELLENCE  
in MENTAL HEALTH and SUBSTANCE USE



UNSW  
AUSTRALIA

## PARTICIPANT INFORMATION STATEMENT AND CONSENT FORM

The Brain Games Study  
Dr Louise Mewton

### How and when will I find out what the results of the research study are?

You have a right to receive feedback about the overall results of this study. You can tell us that you wish to receive feedback by emailing the study co-ordinator, Dr Louise Mewton ([louisem@unsw.edu.au](mailto:louisem@unsw.edu.au)). This feedback will be in the form of a one page report. You will receive this feedback after the study is finished.

### What if I want to withdraw from the research study?

If you do consent to participate, you may withdraw at any time. If you do withdraw, you will be asked to complete and sign the 'Withdrawal of Consent Form' which is provided at the end of this document. Alternatively you can contact the research team and tell them you no longer want to participate.

If you decide to withdraw from the study, we will not collect any more information from you. Please let us know at the time when you withdraw what you would like us to do with the information we have collected about you up to that point. If you wish your information will be removed from our study records and will not be included in the study results, up to the point that we have analysed and published the results.

### What should I do if I have further questions about my involvement in the research study?

The person you may need to contact will depend on the nature of your query. If you want any further information concerning this project or if you have any problems which may be related to your involvement in the project, you can contact the following member/s of the research team:

#### Research Team Contact

|                  |                                                              |
|------------------|--------------------------------------------------------------|
| <b>Name</b>      | Dr Louise Mewton                                             |
| <b>Position</b>  | Research Officer                                             |
| <b>Telephone</b> | 02 8936 1131                                                 |
| <b>Email</b>     | <a href="mailto:louisem@unsw.edu.au">louisem@unsw.edu.au</a> |

If at any stage during the project you become distressed or require additional support from someone not involved in the research please call:

#### Contact for feelings of distress

|                          |                                                              |
|--------------------------|--------------------------------------------------------------|
| <b>Name/Organisation</b> | Kids Helpline                                                |
| <b>Telephone</b>         | 1800 551 800                                                 |
| <b>Email</b>             | <a href="http://www.kidshelp.com.au">www.kidshelp.com.au</a> |

### What if I have a complaint or any concerns about the research study?

If you have any complaints about any aspect of the project, the way it is being conducted, then you may contact:

#### Complaints Contact

|                            |                                                                      |
|----------------------------|----------------------------------------------------------------------|
| <b>Position</b>            | Human Research Ethics Coordinator                                    |
| <b>Telephone</b>           | + 61 2 9385 6222                                                     |
| <b>Email</b>               | <a href="mailto:humanethics@unsw.edu.au">humanethics@unsw.edu.au</a> |
| <b>HC Reference Number</b> | HC15094                                                              |

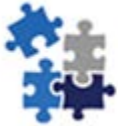

NHMRC CENTRE OF RESEARCH EXCELLENCE  
in MENTAL HEALTH and SUBSTANCE USE



UNSW  
AUSTRALIA

**PARTICIPANT INFORMATION STATEMENT AND CONSENT FORM**

The Brain Games Study  
Dr Louise Newton

**Consent Form – Participant providing own consent**

**Declaration by the participant**

- I have read the Participant Information Sheet or someone has read it to me in a language that I understand;
- I understand the purposes, study tasks and risks of the research described in the project;
- I have had an opportunity to ask questions and I am satisfied with the answers I have received;
- I freely agree to participate in this research study as described and understand that I am free to withdraw at any time during the project and withdrawal will not affect my relationship with any of the named organisations and/or research team members;
- I understand that I will be given a signed copy of this document to keep;

**Participant Signature**

|                                                               |  |
|---------------------------------------------------------------|--|
| Name of Participant (please type)                             |  |
| Please type name again (this will be taken as your signature) |  |
| Date                                                          |  |

**Declaration by Researcher\***

- I have given a verbal explanation of the research study, its study activities and risks and I believe that the participant has understood that explanation.

**Researcher Signature\***

|                                    |  |
|------------------------------------|--|
| Name of Participant (please print) |  |
| Signature of Research Participant  |  |
| Date                               |  |

\*An appropriately qualified member of the research team must provide the explanation of, and information concerning the research study.

**Note:** All parties signing the consent section must date their own signature.

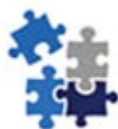

NHMRC CENTRE OF RESEARCH EXCELLENCE  
in MENTAL HEALTH and SUBSTANCE USE



UNSW  
AUSTRALIA

**PARTICIPANT INFORMATION STATEMENT AND CONSENT FORM**

The Brain Games Study  
Dr Louise Mewton

## Form for Withdrawal of Participation

I wish to **WITHDRAW** my consent to participate in the research proposal described above and understand that such withdrawal **WILL NOT** affect my relationship with The University of New South Wales.

### Participant Signature

|                                                         |  |
|---------------------------------------------------------|--|
| Name of Participant<br>(please type)                    |  |
| Signature of Research Participant<br>(please type name) |  |
| Date                                                    |  |

The section for Withdrawal of Participation should be forwarded to:

|          |                                                              |
|----------|--------------------------------------------------------------|
| CI Name: | Louise Mewton                                                |
| Email:   | <a href="mailto:louisem@unsw.edu.au">louisem@unsw.edu.au</a> |
| Phone:   | 02 8936 1131                                                 |

Peer review only



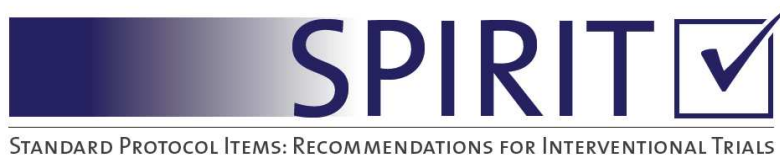

SPIRIT 2013 Checklist: Recommended items to address in a clinical trial protocol and related documents\*

| Section/item                      | Item No | Description                                                                                                                                                                                                                                                                                      |
|-----------------------------------|---------|--------------------------------------------------------------------------------------------------------------------------------------------------------------------------------------------------------------------------------------------------------------------------------------------------|
| <b>Administrative information</b> |         |                                                                                                                                                                                                                                                                                                  |
| Title                             | 1       | Descriptive title identifying the study design, population, interventions, and, if applicable, trial acronym (pg 1)                                                                                                                                                                              |
| Trial registration                | 2a      | Trial identifier and registry name. If not yet registered, name of intended registry (pg 2)                                                                                                                                                                                                      |
|                                   | 2b      | All items from the World Health Organization Trial Registration Data Set (pg 2)                                                                                                                                                                                                                  |
|                                   | 3       | Date and version identifier (footer)                                                                                                                                                                                                                                                             |
| Funding                           | 4       | Sources and types of financial, material, and other support (pg 16)                                                                                                                                                                                                                              |
| Roles and responsibilities        | 5a      | Names, affiliations, and roles of protocol contributors (pg 1 & 15)                                                                                                                                                                                                                              |
|                                   | 5b      | Name and contact information for the trial sponsor (N/A)                                                                                                                                                                                                                                         |
|                                   | 5c      | Role of study sponsor and funders, if any, in study design; collection, management, analysis, and interpretation of data; writing of the report; and the decision to submit the report for publication, including whether they will have ultimate authority over any of these activities (pg 16) |
|                                   | 5d      | Composition, roles, and responsibilities of the coordinating centre, steering committee, endpoint adjudication committee, data management team, and other individuals or groups overseeing the trial, if applicable (see Item 21a for data monitoring committee) (N/A)                           |
| <b>Introduction</b>               |         |                                                                                                                                                                                                                                                                                                  |
| Background and rationale          | 6a      | Description of research question and justification for undertaking the trial, including summary of relevant studies (published and unpublished) examining benefits and harms for each intervention (pg 4-8)                                                                                      |
|                                   | 6b      | Explanation for choice of comparators (pg 11)                                                                                                                                                                                                                                                    |
| Objectives                        | 7       | Specific objectives or hypotheses (pg 8)                                                                                                                                                                                                                                                         |

1  
2  
3  
4  
5  
6  
7  
8  
9  
10  
11  
12  
13  
14  
15  
16  
17  
18  
19  
20  
21  
22  
23  
24  
25  
26  
27  
28  
29  
30  
31  
32  
33  
34  
35  
36  
37  
38  
39  
40  
41  
42  
43  
44  
45  
46  
47  
48  
49  
50  
51  
52  
53  
54  
55  
56  
57  
58  
59  
60

|              |   |                                                                                                                                                                                                                  |
|--------------|---|------------------------------------------------------------------------------------------------------------------------------------------------------------------------------------------------------------------|
| Trial design | 8 | Description of trial design including type of trial (eg, parallel group, crossover, factorial, single group), allocation ratio, and framework (eg, superiority, equivalence, noninferiority, exploratory) (pg 8) |
|--------------|---|------------------------------------------------------------------------------------------------------------------------------------------------------------------------------------------------------------------|

### **Methods: Participants, interventions, and outcomes**

|               |   |                                                                                                                                                                                            |
|---------------|---|--------------------------------------------------------------------------------------------------------------------------------------------------------------------------------------------|
| Study setting | 9 | Description of study settings (eg, community clinic, academic hospital) and list of countries where data will be collected. Reference to where list of study sites can be obtained (10-11) |
|---------------|---|--------------------------------------------------------------------------------------------------------------------------------------------------------------------------------------------|

|                      |    |                                                                                                                                                                                                        |
|----------------------|----|--------------------------------------------------------------------------------------------------------------------------------------------------------------------------------------------------------|
| Eligibility criteria | 10 | Inclusion and exclusion criteria for participants. If applicable, eligibility criteria for study centres and individuals who will perform the interventions (eg, surgeons, psychotherapists) (pg 9-10) |
|----------------------|----|--------------------------------------------------------------------------------------------------------------------------------------------------------------------------------------------------------|

|               |     |                                                                                                                                   |
|---------------|-----|-----------------------------------------------------------------------------------------------------------------------------------|
| Interventions | 11a | Interventions for each group with sufficient detail to allow replication, including how and when they will be administered (p 11) |
|---------------|-----|-----------------------------------------------------------------------------------------------------------------------------------|

|  |     |                                                                                                                                                                                                       |
|--|-----|-------------------------------------------------------------------------------------------------------------------------------------------------------------------------------------------------------|
|  | 11b | Criteria for discontinuing or modifying allocated interventions for a given trial participant (eg, drug dose change in response to harms, participant request, or improving/worsening disease) (p 11) |
|--|-----|-------------------------------------------------------------------------------------------------------------------------------------------------------------------------------------------------------|

|  |     |                                                                                                                                                          |
|--|-----|----------------------------------------------------------------------------------------------------------------------------------------------------------|
|  | 11c | Strategies to improve adherence to intervention protocols, and any procedures for monitoring adherence (eg, drug tablet return, laboratory tests) (p 11) |
|--|-----|----------------------------------------------------------------------------------------------------------------------------------------------------------|

|  |     |                                                                                                      |
|--|-----|------------------------------------------------------------------------------------------------------|
|  | 11d | Relevant concomitant care and interventions that are permitted or prohibited during the trial (p 11) |
|--|-----|------------------------------------------------------------------------------------------------------|

|          |    |                                                                                                                                                                                                                                                                                                                                                                                      |
|----------|----|--------------------------------------------------------------------------------------------------------------------------------------------------------------------------------------------------------------------------------------------------------------------------------------------------------------------------------------------------------------------------------------|
| Outcomes | 12 | Primary, secondary, and other outcomes, including the specific measurement variable (eg, systolic blood pressure), analysis metric (eg, change from baseline, final value, time to event), method of aggregation (eg, median, proportion), and time point for each outcome. Explanation of the clinical relevance of chosen efficacy and harm outcomes is strongly recommended (p 9) |
|----------|----|--------------------------------------------------------------------------------------------------------------------------------------------------------------------------------------------------------------------------------------------------------------------------------------------------------------------------------------------------------------------------------------|

|                      |    |                                                                                                                                                                                            |
|----------------------|----|--------------------------------------------------------------------------------------------------------------------------------------------------------------------------------------------|
| Participant timeline | 13 | Time schedule of enrolment, interventions (including any run-ins and washouts), assessments, and visits for participants. A schematic diagram is highly recommended (see Figure) (p 11-12) |
|----------------------|----|--------------------------------------------------------------------------------------------------------------------------------------------------------------------------------------------|

|             |    |                                                                                                                                                                                             |
|-------------|----|---------------------------------------------------------------------------------------------------------------------------------------------------------------------------------------------|
| Sample size | 14 | Estimated number of participants needed to achieve study objectives and how it was determined, including clinical and statistical assumptions supporting any sample size calculations (p 9) |
|-------------|----|---------------------------------------------------------------------------------------------------------------------------------------------------------------------------------------------|

|             |    |                                                                                            |
|-------------|----|--------------------------------------------------------------------------------------------|
| Recruitment | 15 | Strategies for achieving adequate participant enrolment to reach target sample size (p 10) |
|-------------|----|--------------------------------------------------------------------------------------------|

### **Methods: Assignment of interventions (for controlled trials)**

Allocation:

|    |                |     |                                                                         |
|----|----------------|-----|-------------------------------------------------------------------------|
| 1  |                |     |                                                                         |
| 2  | Sequence       | 16a | Method of generating the allocation sequence (eg, computer-             |
| 3  | generation     |     | generated random numbers), and list of any factors for stratification.  |
| 4  |                |     | To reduce predictability of a random sequence, details of any planned   |
| 5  |                |     | restriction (eg, blocking) should be provided in a separate document    |
| 6  |                |     | that is unavailable to those who enrol participants or assign           |
| 7  |                |     | interventions (pg 10-11)                                                |
| 8  |                |     |                                                                         |
| 9  | Allocation     | 16b | Mechanism of implementing the allocation sequence (eg, central          |
| 10 | concealment    |     | telephone; sequentially numbered, opaque, sealed envelopes),            |
| 11 | mechanism      |     | describing any steps to conceal the sequence until interventions are    |
| 12 |                |     | assigned (pg 10-11)                                                     |
| 13 |                |     |                                                                         |
| 14 | Implementation | 16c | Who will generate the allocation sequence, who will enrol participants, |
| 15 |                |     | and who will assign participants to interventions (pg 10-11)            |
| 16 |                |     |                                                                         |
| 17 | Blinding       | 17a | Who will be blinded after assignment to interventions (eg, trial        |
| 18 | (masking)      |     | participants, care providers, outcome assessors, data analysts), and    |
| 19 |                |     | how (pg 10-11)                                                          |
| 20 |                |     |                                                                         |
| 21 |                | 17b | If blinded, circumstances under which unblinding is permissible, and    |
| 22 |                |     | procedure for revealing a participant's allocated intervention during   |
| 23 |                |     | the trial (pg 10-11)                                                    |
| 24 |                |     |                                                                         |
| 25 |                |     |                                                                         |
| 26 |                |     |                                                                         |

#### 27 **Methods: Data collection, management, and analysis**

|    |                 |     |                                                                          |
|----|-----------------|-----|--------------------------------------------------------------------------|
| 28 |                 |     |                                                                          |
| 29 | Data collection | 18a | Plans for assessment and collection of outcome, baseline, and other      |
| 30 | methods         |     | trial data, including any related processes to promote data quality (eg, |
| 31 |                 |     | duplicate measurements, training of assessors) and a description of      |
| 32 |                 |     | study instruments (eg, questionnaires, laboratory tests) along with      |
| 33 |                 |     | their reliability and validity, if known. Reference to where data        |
| 34 |                 |     | collection forms can be found, if not in the protocol (pg 12-14)         |
| 35 |                 |     |                                                                          |
| 36 |                 | 18b | Plans to promote participant retention and complete follow-up,           |
| 37 |                 |     | including list of any outcome data to be collected for participants who  |
| 38 |                 |     | discontinue or deviate from intervention protocols (pg 11)               |
| 39 |                 |     |                                                                          |
| 40 | Data            | 19  | Plans for data entry, coding, security, and storage, including any       |
| 41 | management      |     | related processes to promote data quality (eg, double data entry;        |
| 42 |                 |     | range checks for data values). Reference to where details of data        |
| 43 |                 |     | management procedures can be found, if not in the protocol (p. 14)       |
| 44 |                 |     |                                                                          |
| 45 |                 |     |                                                                          |
| 46 | Statistical     | 20a | Statistical methods for analysing primary and secondary outcomes.        |
| 47 | methods         |     | Reference to where other details of the statistical analysis plan can be |
| 48 |                 |     | found, if not in the protocol (pg 14-15)                                 |
| 49 |                 |     |                                                                          |
| 50 |                 | 20b | Methods for any additional analyses (eg, subgroup and adjusted           |
| 51 |                 |     | analyses) (pg 14-15)                                                     |
| 52 |                 |     |                                                                          |
| 53 |                 | 20c | Definition of analysis population relating to protocol non-adherence     |
| 54 |                 |     | (eg, as randomised analysis), and any statistical methods to handle      |
| 55 |                 |     | missing data (eg, multiple imputation) (pg 14)                           |
| 56 |                 |     |                                                                          |
| 57 |                 |     |                                                                          |
| 58 |                 |     |                                                                          |
| 59 |                 |     |                                                                          |
| 60 |                 |     |                                                                          |

**Methods: Monitoring**

- 1  
2  
3  
4  
5  
6  
7  
8  
9  
10  
11  
12  
13  
14  
15  
16  
17  
18  
19  
20  
21  
22
- |                 |     |                                                                                                                                                                                                                                                                                                                                               |
|-----------------|-----|-----------------------------------------------------------------------------------------------------------------------------------------------------------------------------------------------------------------------------------------------------------------------------------------------------------------------------------------------|
| Data monitoring | 21a | Composition of data monitoring committee (DMC); summary of its role and reporting structure; statement of whether it is independent from the sponsor and competing interests; and reference to where further details about its charter can be found, if not in the protocol. Alternatively, an explanation of why a DMC is not needed (pg 11) |
|                 | 21b | Description of any interim analyses and stopping guidelines, including who will have access to these interim results and make the final decision to terminate the trial (n/a)                                                                                                                                                                 |
| Harms           | 22  | Plans for collecting, assessing, reporting, and managing solicited and spontaneously reported adverse events and other unintended effects of trial interventions or trial conduct (pg 11)                                                                                                                                                     |
| Auditing        | 23  | Frequency and procedures for auditing trial conduct, if any, and whether the process will be independent from investigators and the sponsor (n/a)                                                                                                                                                                                             |

**Ethics and dissemination**

- 23  
24  
25  
26  
27  
28  
29  
30  
31  
32  
33  
34  
35  
36  
37  
38  
39  
40  
41  
42  
43  
44  
45  
46  
47  
48  
49  
50  
51  
52  
53  
54  
55  
56  
57  
58  
59  
60
- |                               |     |                                                                                                                                                                                                                                          |
|-------------------------------|-----|------------------------------------------------------------------------------------------------------------------------------------------------------------------------------------------------------------------------------------------|
| Research ethics approval      | 24  | Plans for seeking research ethics committee/institutional review board (REC/IRB) approval (pg 15)                                                                                                                                        |
| Protocol amendments           | 25  | Plans for communicating important protocol modifications (eg, changes to eligibility criteria, outcomes, analyses) to relevant parties (eg, investigators, REC/IRBs, trial participants, trial registries, journals, regulators) (pg 15) |
| Consent or assent             | 26a | Who will obtain informed consent or assent from potential trial participants or authorised surrogates, and how (see Item 32) (pg 10)                                                                                                     |
|                               | 26b | Additional consent provisions for collection and use of participant data and biological specimens in ancillary studies, if applicable (n/a)                                                                                              |
| Confidentiality               | 27  | How personal information about potential and enrolled participants will be collected, shared, and maintained in order to protect confidentiality before, during, and after the trial (pg 14)                                             |
| Declaration of interests      | 28  | Financial and other competing interests for principal investigators for the overall trial and each study site (pg 16-17)                                                                                                                 |
| Access to data                | 29  | Statement of who will have access to the final trial dataset, and disclosure of contractual agreements that limit such access for investigators (pg 15)                                                                                  |
| Ancillary and post-trial care | 30  | Provisions, if any, for ancillary and post-trial care, and for compensation to those who suffer harm from trial participation (n/a)                                                                                                      |

|    |               |     |                                                                              |
|----|---------------|-----|------------------------------------------------------------------------------|
| 1  |               |     |                                                                              |
| 2  |               |     |                                                                              |
| 3  | Dissemination | 31a | Plans for investigators and sponsor to communicate trial results to          |
| 4  | policy        |     | participants, healthcare professionals, the public, and other relevant       |
| 5  |               |     | groups (eg, via publication, reporting in results databases, or other        |
| 6  |               |     | data sharing arrangements), including any publication restrictions (pg       |
| 7  |               |     | 15)                                                                          |
| 8  |               | 31b | Authorship eligibility guidelines and any intended use of professional       |
| 9  |               |     | writers (pg 15)                                                              |
| 10 |               |     |                                                                              |
| 11 |               | 31c | Plans, if any, for granting public access to the full protocol, participant- |
| 12 |               |     | level dataset, and statistical code (pg 15)                                  |
| 13 |               |     |                                                                              |
| 14 |               |     |                                                                              |

## 15 Appendices

|    |                  |    |                                                                          |
|----|------------------|----|--------------------------------------------------------------------------|
| 16 |                  |    |                                                                          |
| 17 | Informed consent | 32 | Model consent form and other related documentation given to              |
| 18 | materials        |    | participants and authorised surrogates (see Appendix)                    |
| 19 |                  |    |                                                                          |
| 20 | Biological       | 33 | Plans for collection, laboratory evaluation, and storage of biological   |
| 21 | specimens        |    | specimens for genetic or molecular analysis in the current trial and for |
| 22 |                  |    | future use in ancillary studies, if applicable (n/a)                     |
| 23 |                  |    |                                                                          |

---

24 \*It is strongly recommended that this checklist be read in conjunction with the SPIRIT 2013  
25 Explanation & Elaboration for important clarification on the items. Amendments to the  
26 protocol should be tracked and dated. The SPIRIT checklist is copyrighted by the SPIRIT  
27 Group under the Creative Commons "[Attribution-NonCommercial-NoDerivs 3.0 Unported](https://creativecommons.org/licenses/by-nc-nd/3.0/)"  
28 license.  
29  
30  
31  
32  
33  
34  
35  
36  
37  
38  
39  
40  
41  
42  
43  
44  
45  
46  
47  
48  
49  
50  
51  
52  
53  
54  
55  
56  
57  
58  
59  
60
